# Supplementary material for: Thymoquinone Enhances the Antitumor Activity of Apatinib Against Gastrointestinal Tumors Through the STAT3 Pathway
Source: Research Square preprint supplement (doi:10.21203/rs.3.rs-4677300/v1), 2024-08-01
Supplement: Supplementary file 1 [file 5e4414f21aef9c789938687f.docx]

Table 1. Primer sequences

| Primer Name | Sequences |
| --- | --- |
| JAK2-F | GGCCTTCTTTCAGAGCCATCA |
| JAK2-R | TTTTACAGCGACCACCTCCC |
| STAT3-F | GCCCTTTGGAACGAAGGGTA |
| STAT3-R | TGGTATTGCTGCAGGTCGTT |
| BAX-F | CGGGTTGTCGCCCTTTTCTA |
| BAX-R | GAGGAAGTCCAATGTCCAGCC |
| BCL2-F | ATCGCCCTGTGGATGACTGA |
| BCL2-R | GAGACAGCCAGGAGAAATCAAAC |
| MMP2-F | AGTGGATGATGCCTTTGCTCG |
| MMP2-R | CAAGGTCCATAGCTCATCGTCAT |
| MMP9-F | CCAGTCCACCCTTGTGCTCTT |
| MMP9-R | TGCCACCCGAGTGTAACCAT |
| E-cadherin-F | GGGTGTCGAGGGAAAAATAGG |
| E-cadherin-R | CGAGAGCTACACGTTCACGG |
| N-cadherin-F | CCCGCCGTTTCATCCATACCAC |
| N-cadherin-R | CGCCATCATCGCTATCCTTCTGTG |
| Vimentin-F | AGGCGGCCAATAGTGTCTTG |
| Vimentin-R | TGCCCTTAAAGGAACCAATGAG |
| cyclinD1-F | GCTGCGAAGTGGAAACCATC |
| cyclinD1-R | CCTCCTTCTGCACACATTTGAA |
| GAPDH-F | TTTGGTATCGTGGAAGGAC |
| GAPDH-R | GTGGAGGAGTGGGTGTCGC |
