# Supplementary material for: Thymoquinone Enhances the Antitumor Activity of Apatinib Against Gastrointestinal Tumors Through the STAT3 Pathway
Source: Research Square preprint supplement (doi:10.21203/rs.3.rs-4677300/v1), 2024-08-01
Supplement: Supplementary file 1 [file b60e56fab3405d12fb265aa1.pdf]

## HCT116 - BAX

Protein molecular weights in order 180 140 100 75 60 45 35 25  
WB results purpose and internal reference are different parts of one gel

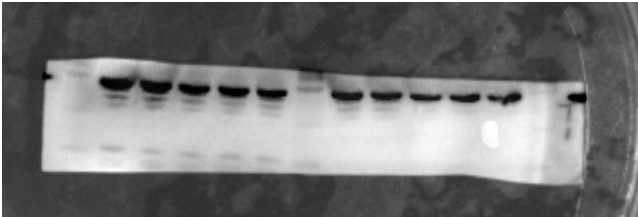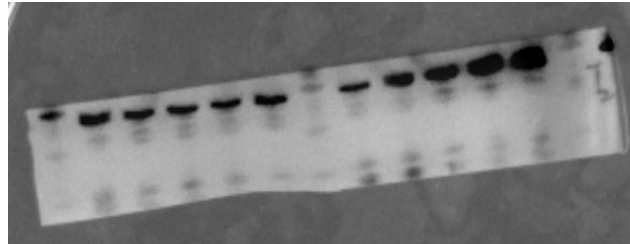

Internal reference protein bands

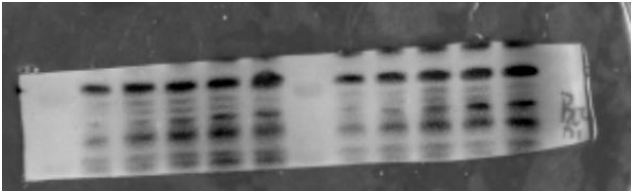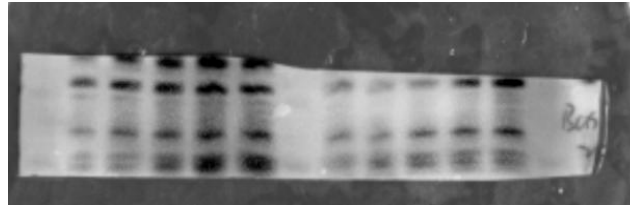

Target protein bands

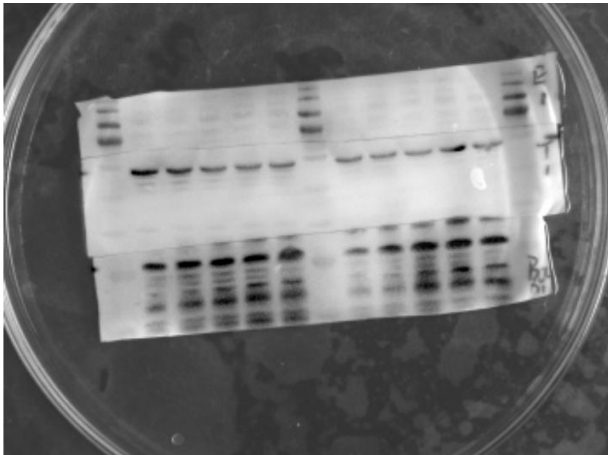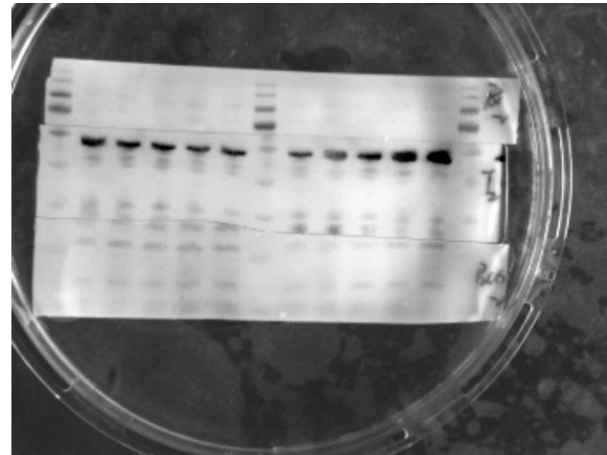

Destination Strip Internal Reference Strip  
Whole Mold Exposure

## HCT116 - BCL2

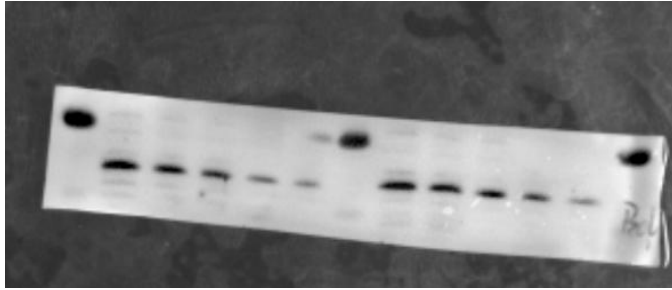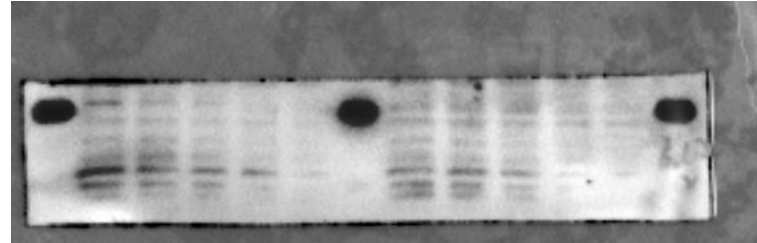

Target protein bands

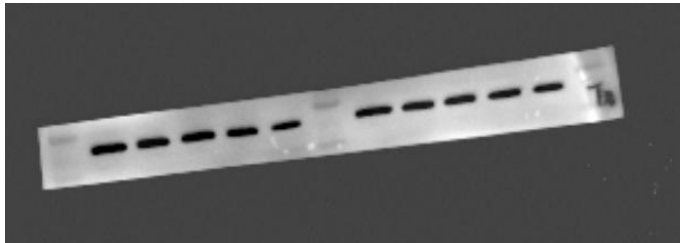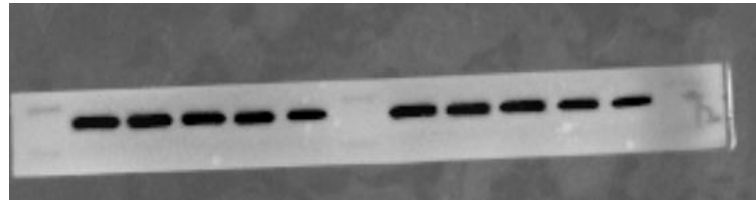

Internal reference protein bands

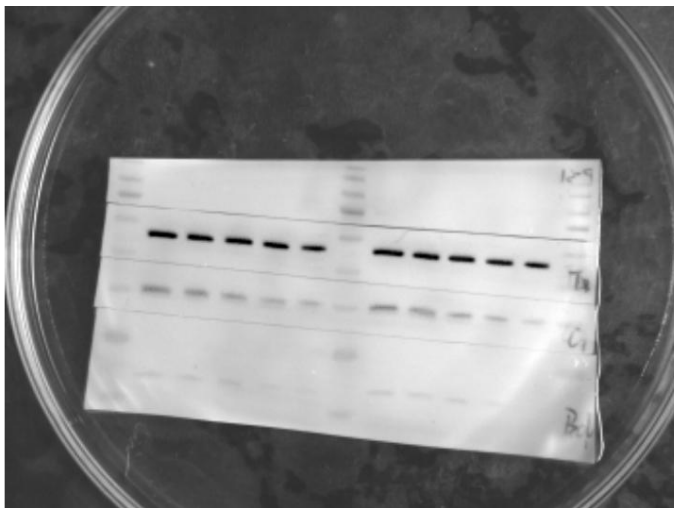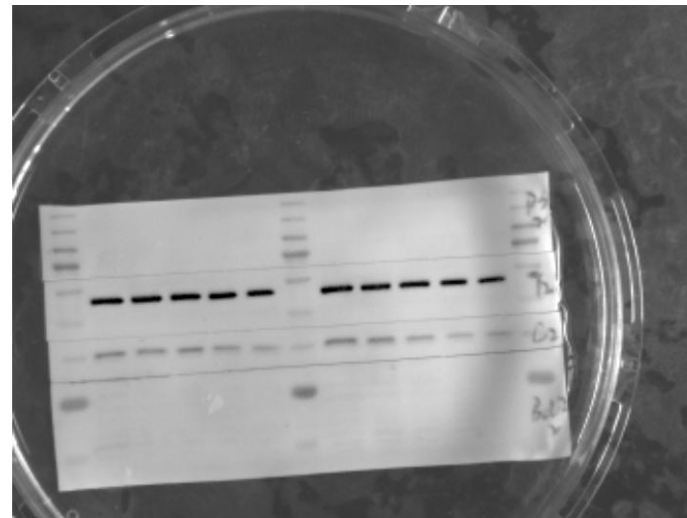

Destination Strip Internal Reference  
Strip Whole Mold Exposure

## HCT116 - CyclinD1

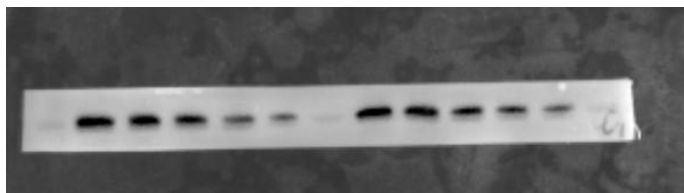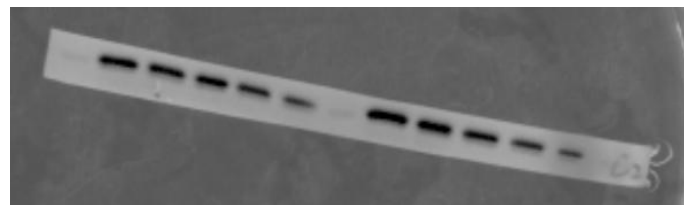

Target protein bands

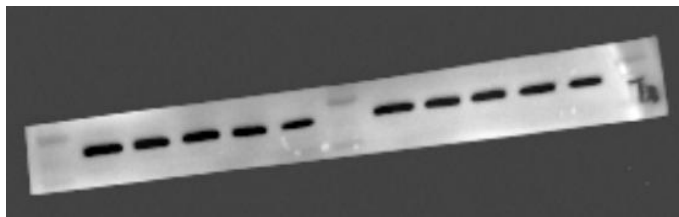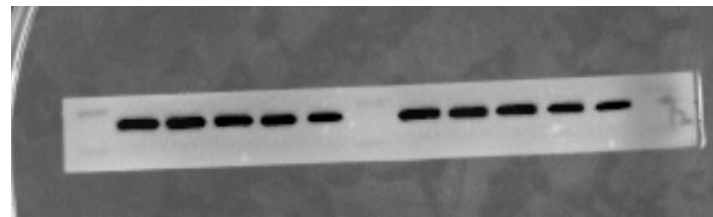

Internal reference protein bands

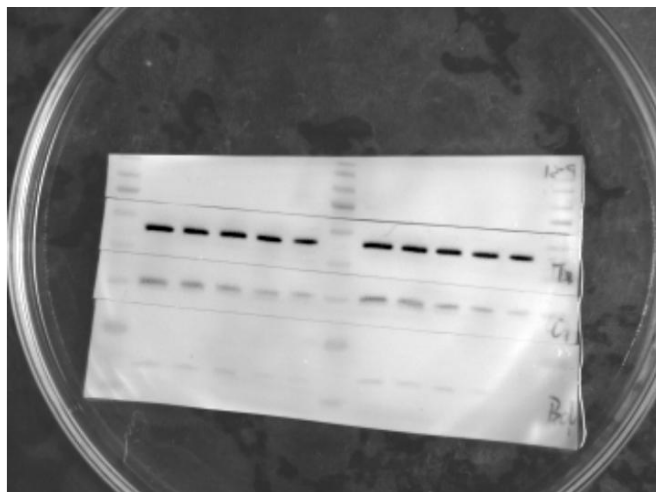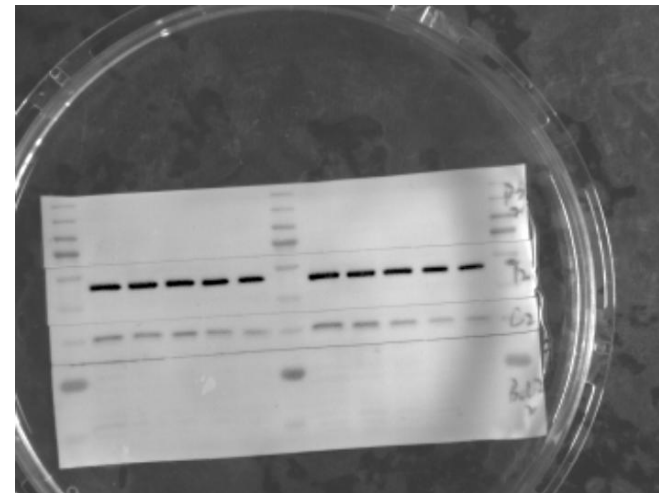

Destination Strip Internal Reference  
Strip Whole Mold Exposure

HCT116 - E-Cadherin

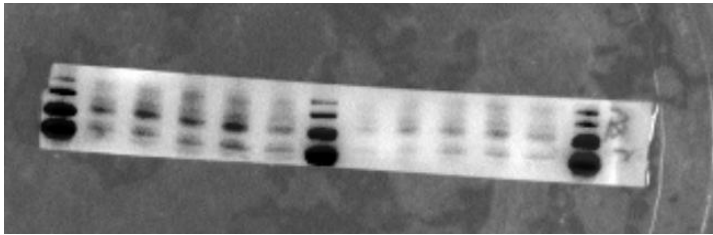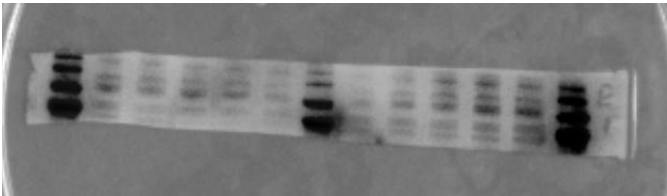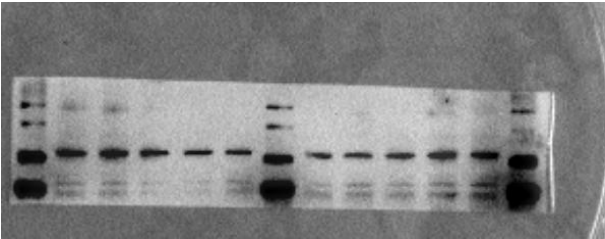

Target protein bands

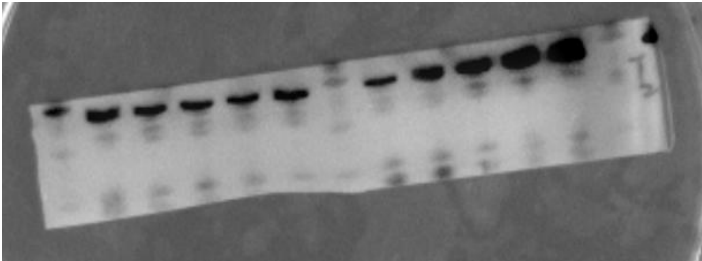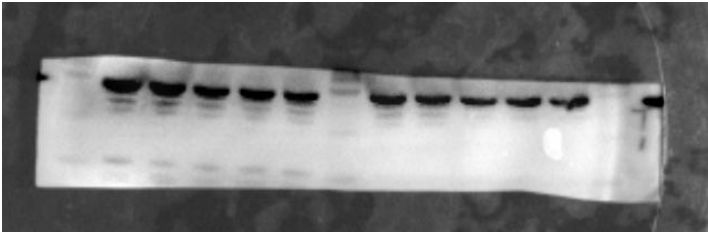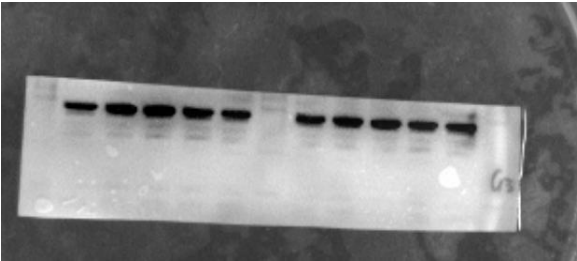

Internal reference protein bands

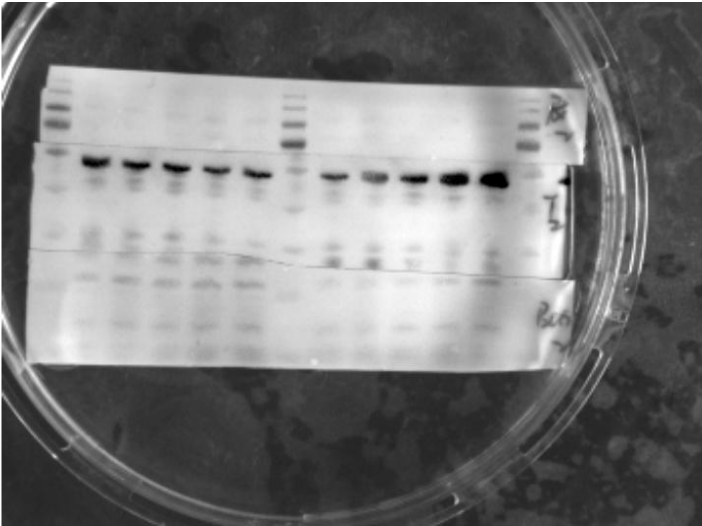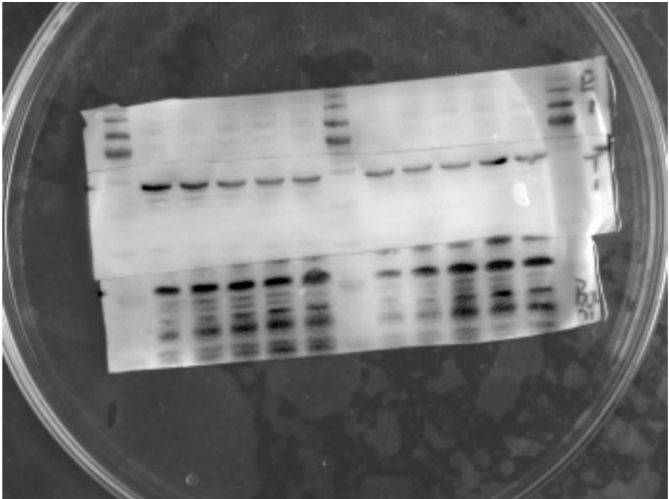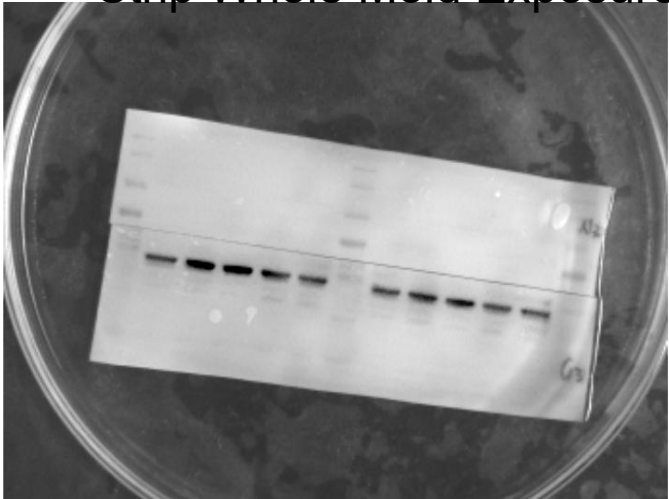

Destination Strip Internal Reference  
Strip Whole Mold Exposure

## HCT116 - JAK2

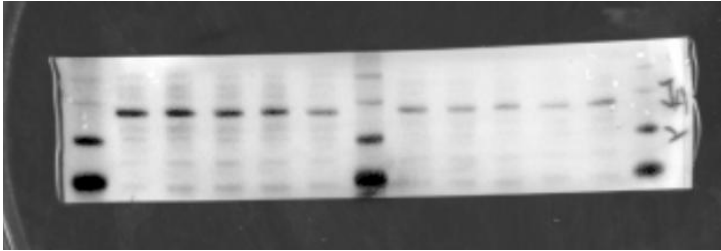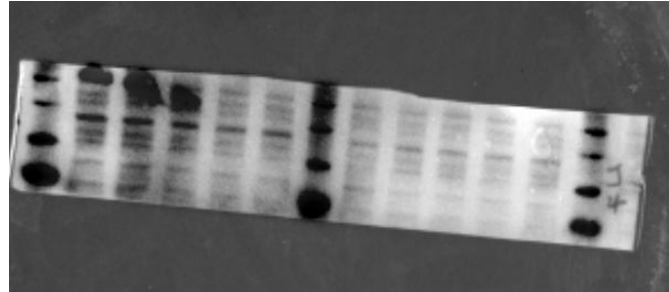

Target protein bands

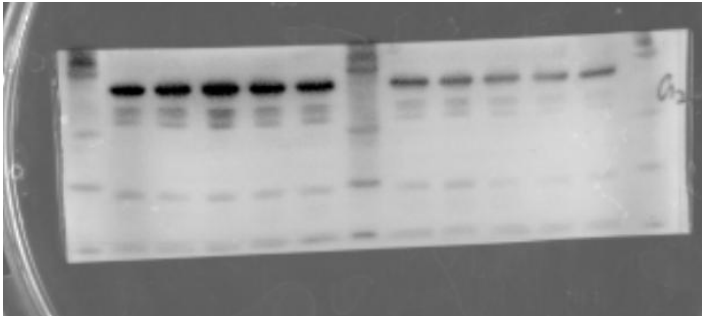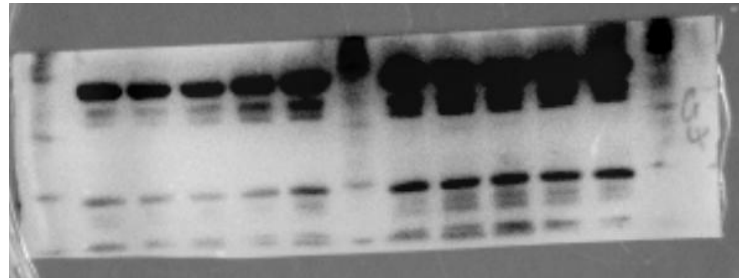

Internal reference protein bands

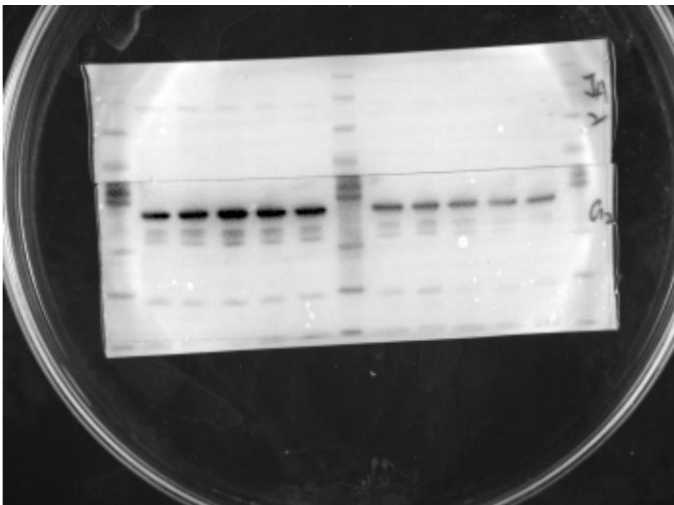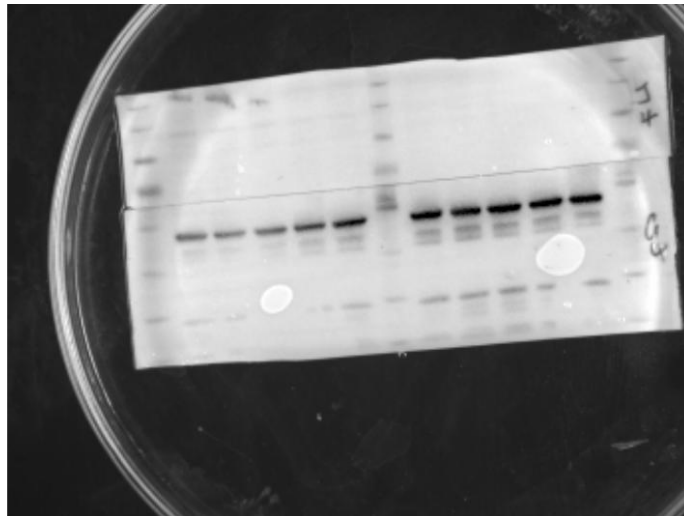

Destination Strip Internal Reference  
Strip Whole Mold Exposure

## HCT116 - MMP2

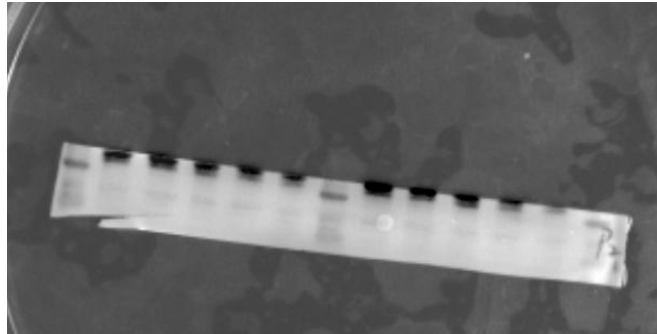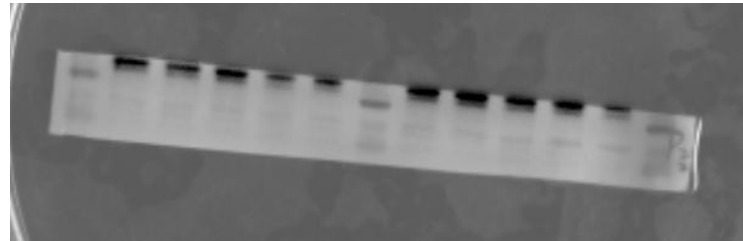

Target protein bands

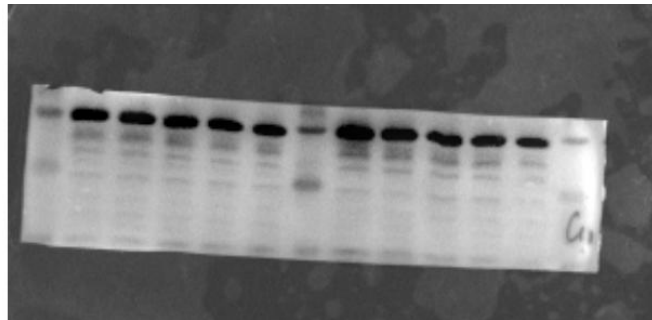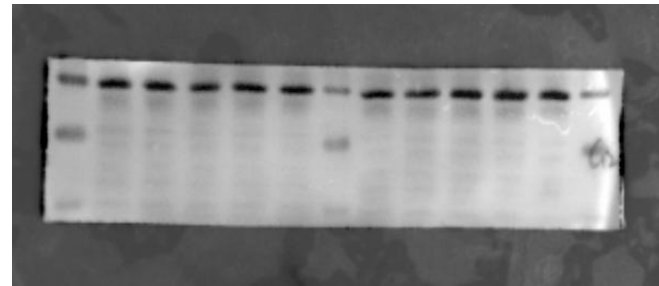

Internal reference protein bands

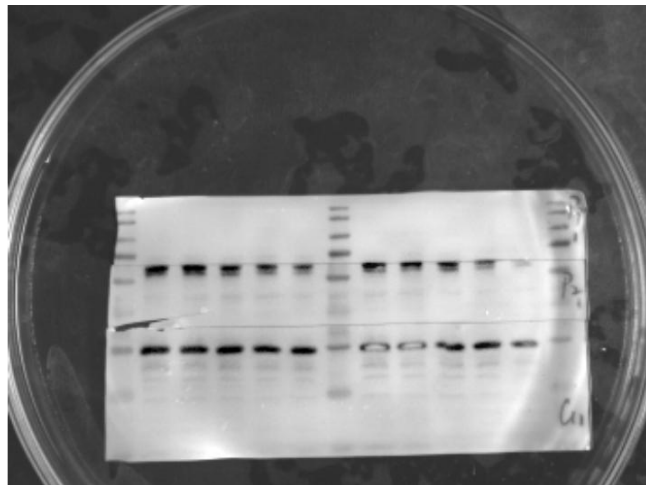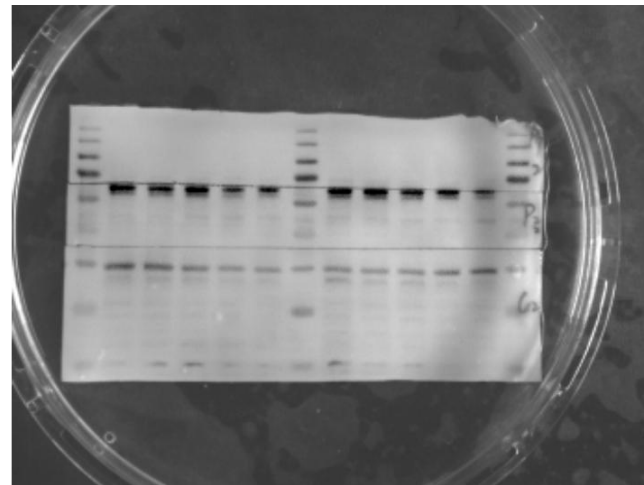

Destination Strip Internal Reference  
Strip Whole Mold Exposure

## HCT116 - MMP9

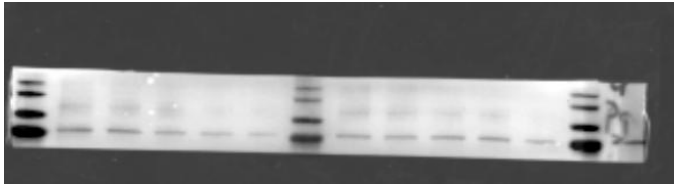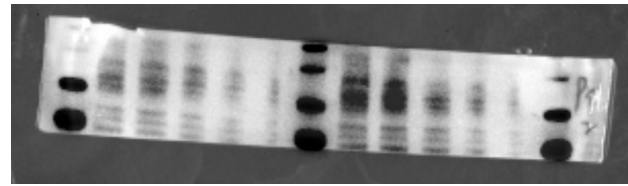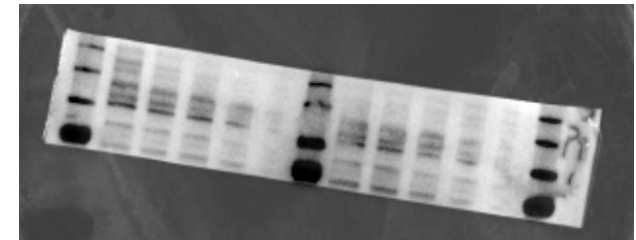

Target protein bands

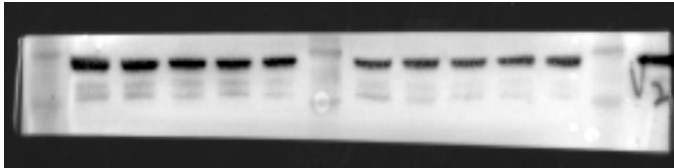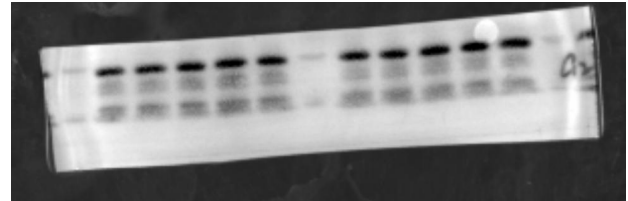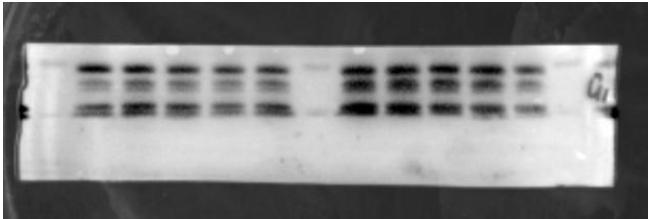

Internal reference protein bands

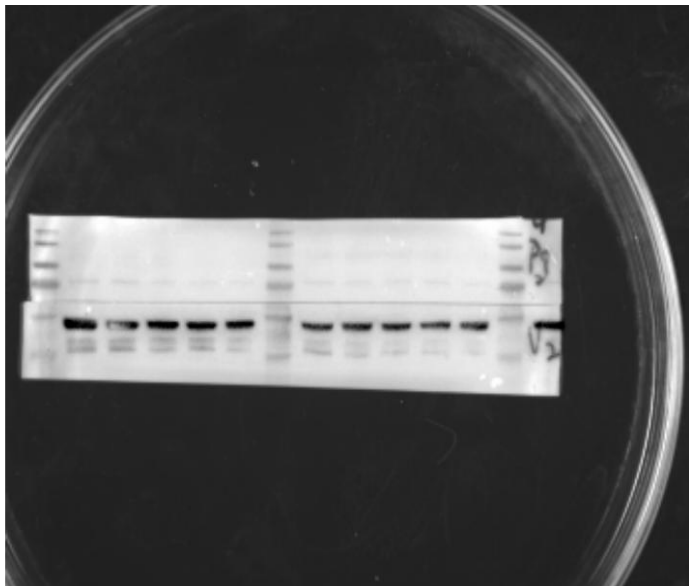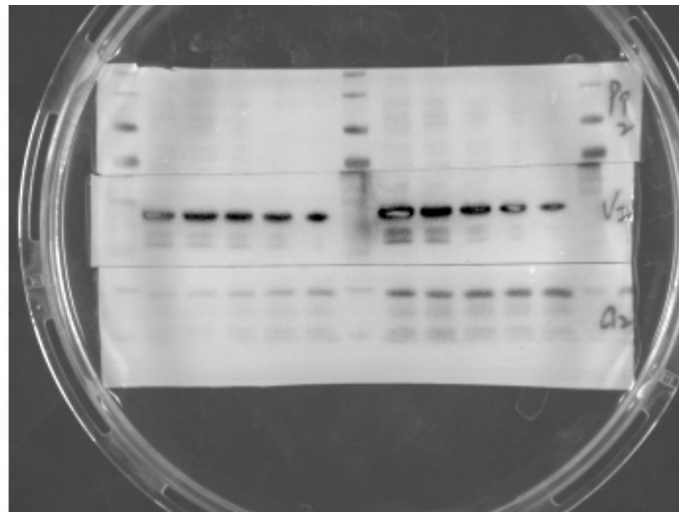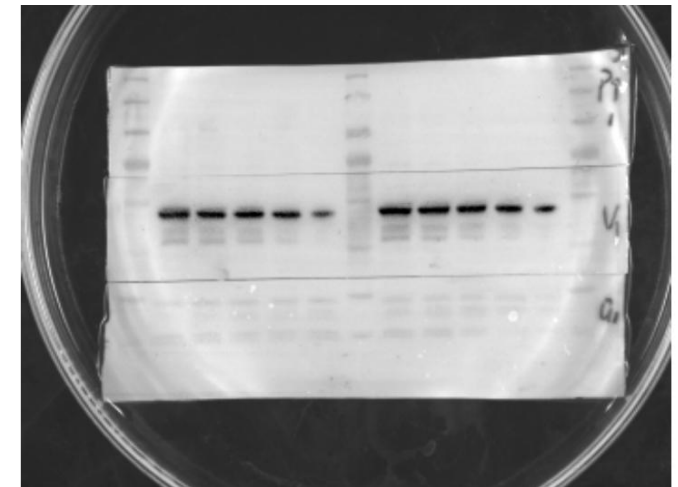

Destination Strip Internal Reference  
Strip Whole Mold Exposure

## HCT116 - N-Cadherin

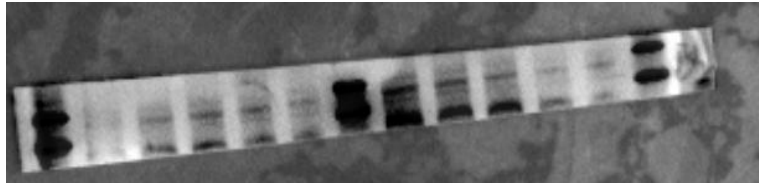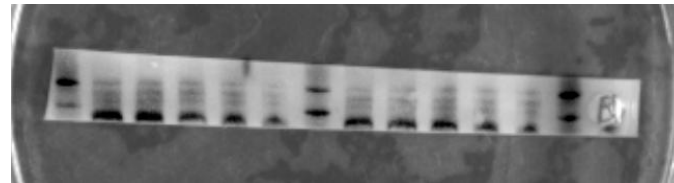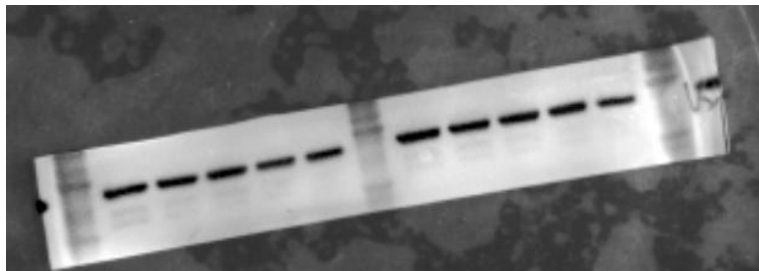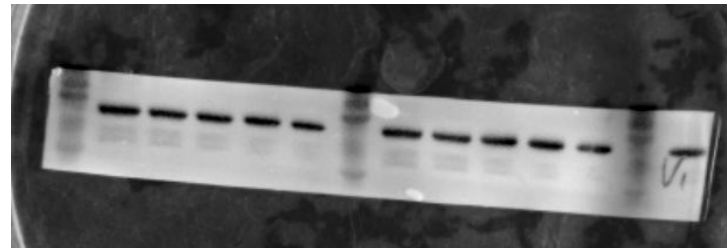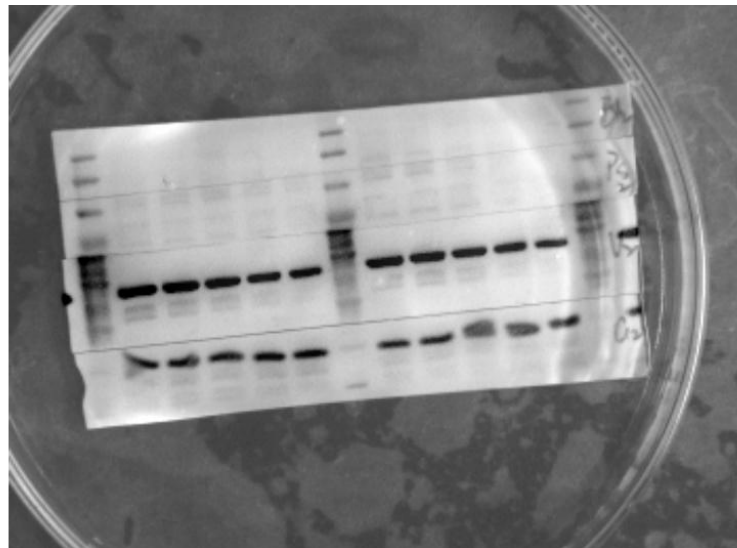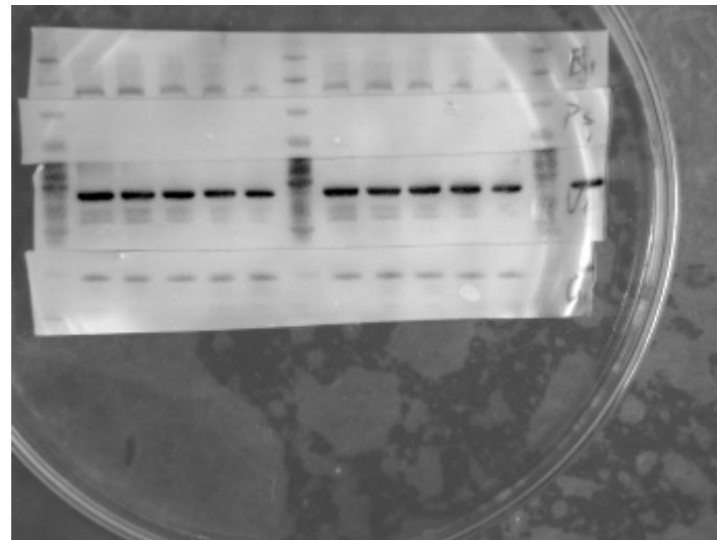

## Internal reference protein bands

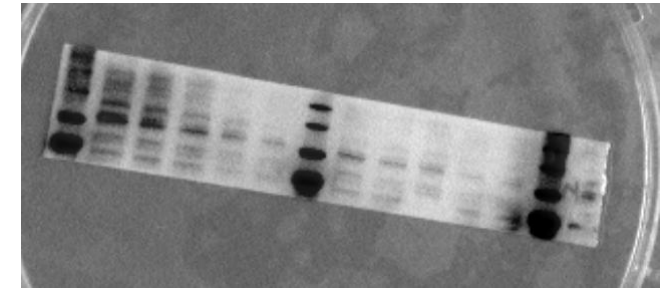

## Target protein bands

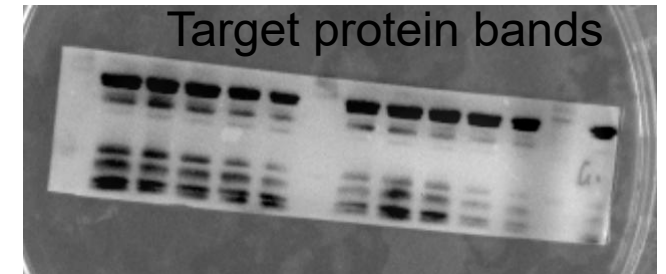

## Destination Strip Internal Reference Strip Whole Mold Exposure

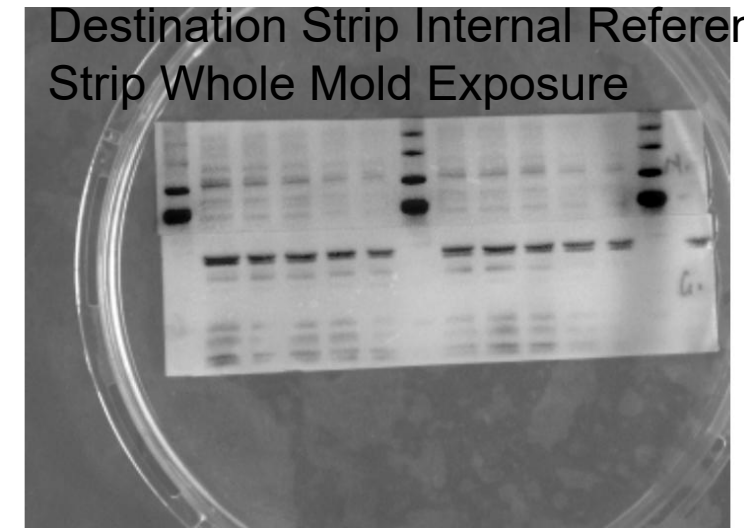

## HCT116 - P-JAK2

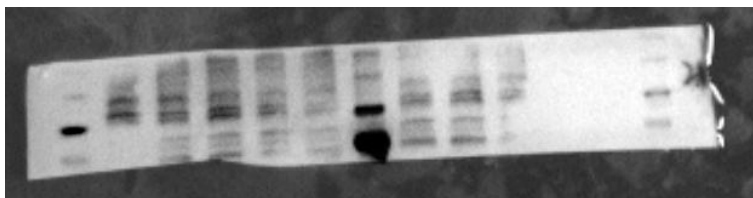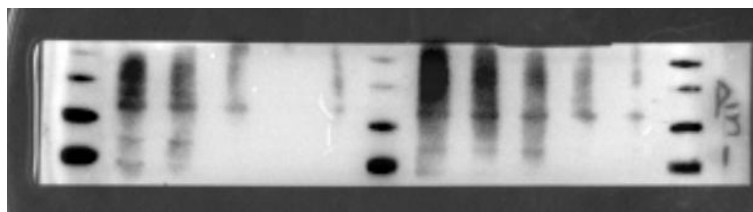

Target protein bands

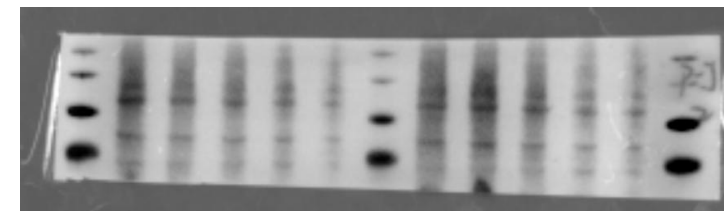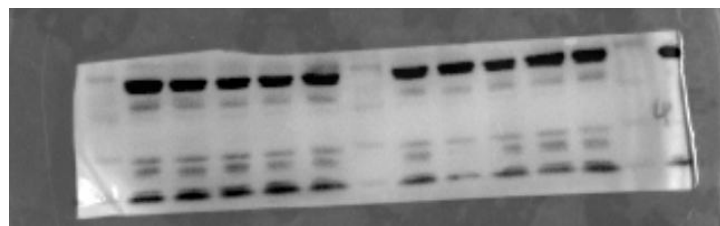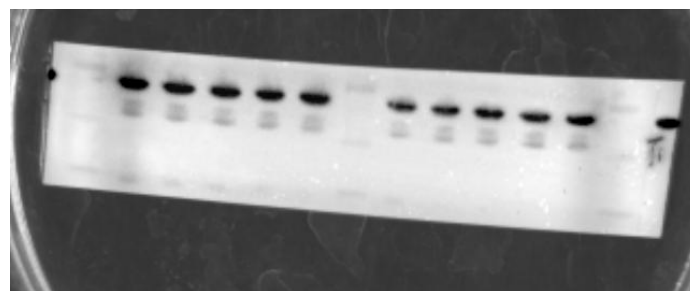

Internal reference protein bands

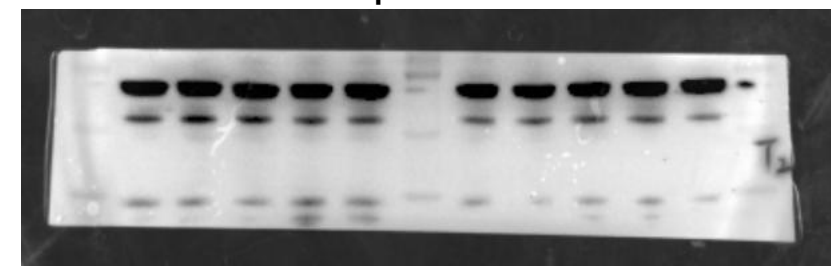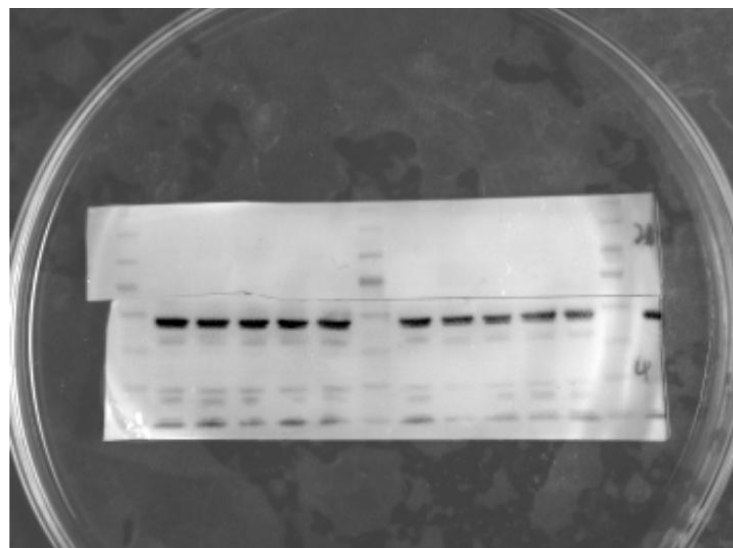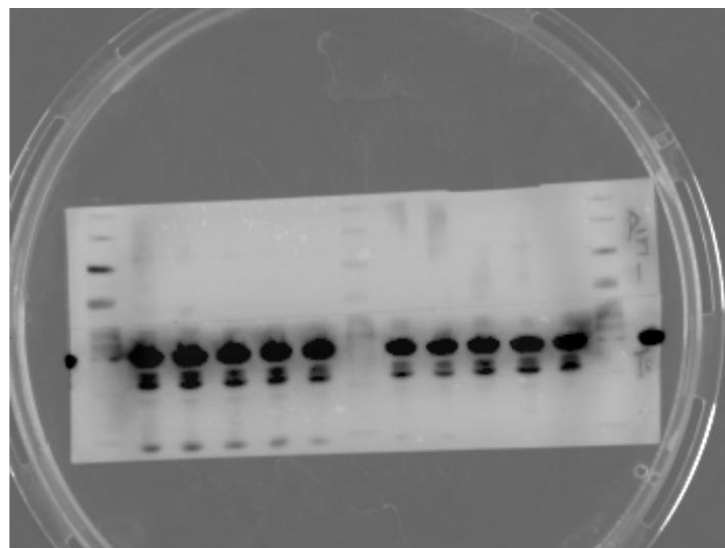

Destination Strip Internal Reference  
Strip Whole Mold Exposure

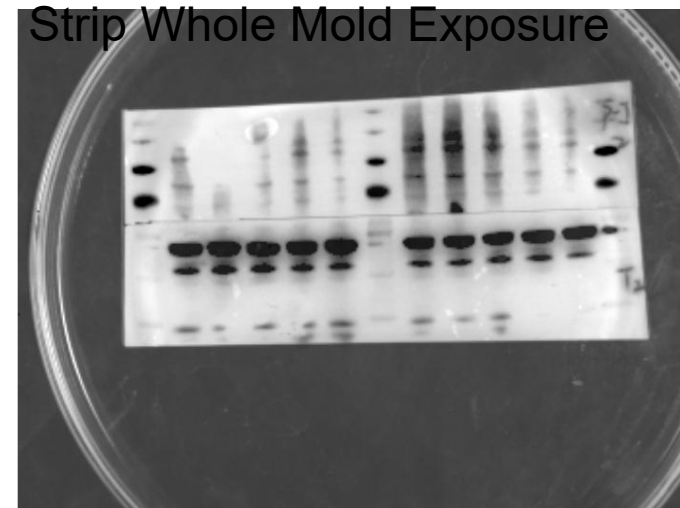

## HCT116 - P-STAT3

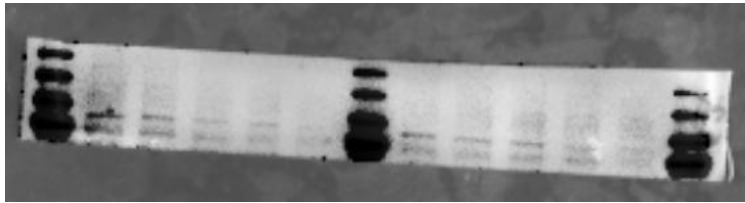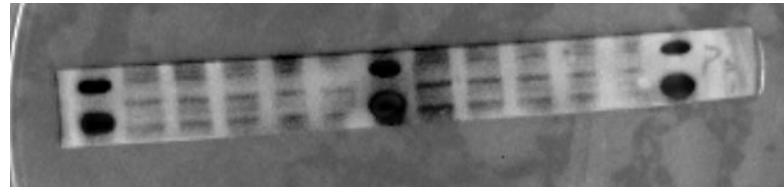

Target protein bands

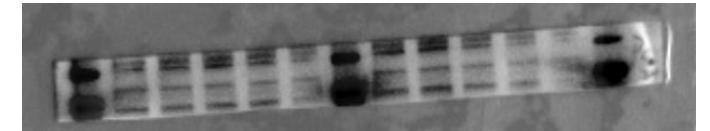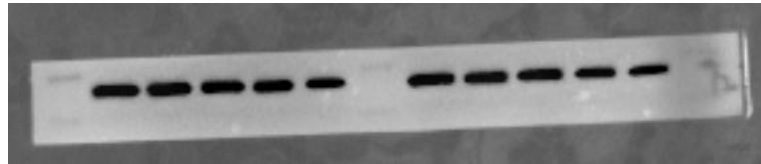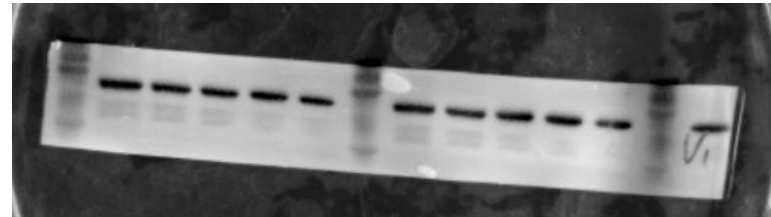

Internal reference protein bands

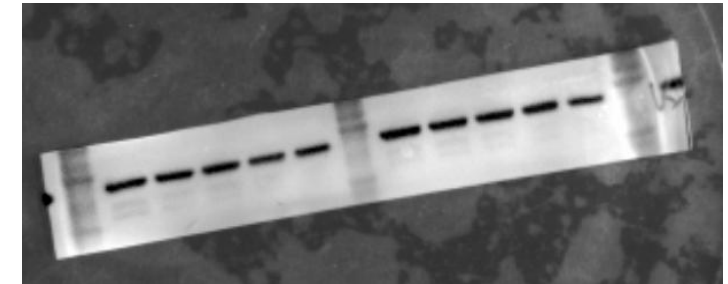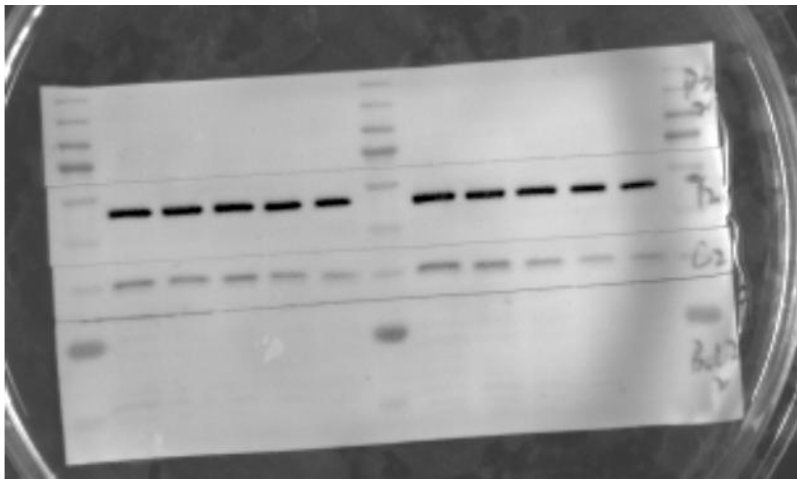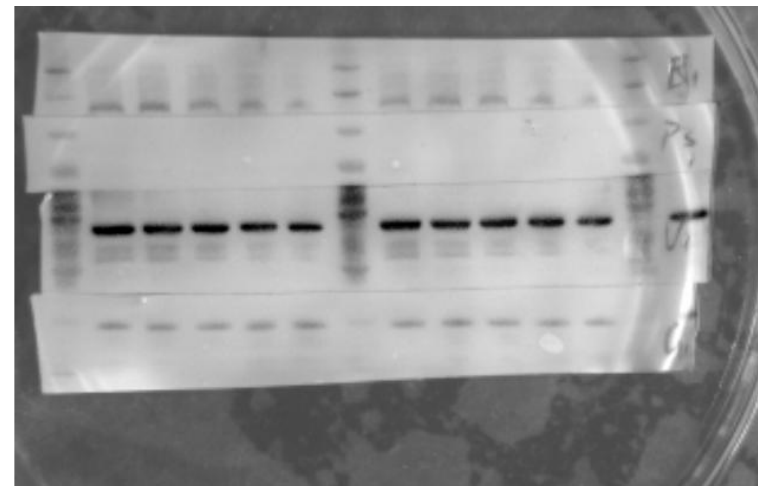

Destination Strip Internal Reference  
Strip Whole Mold Exposure

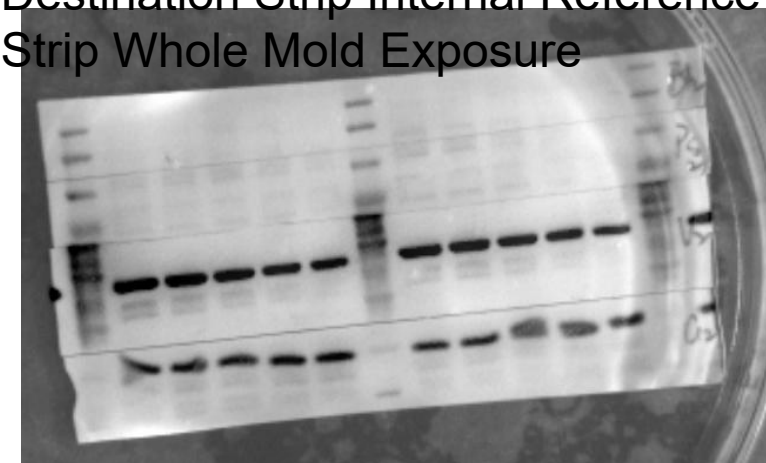

## HCT116 - STAT3

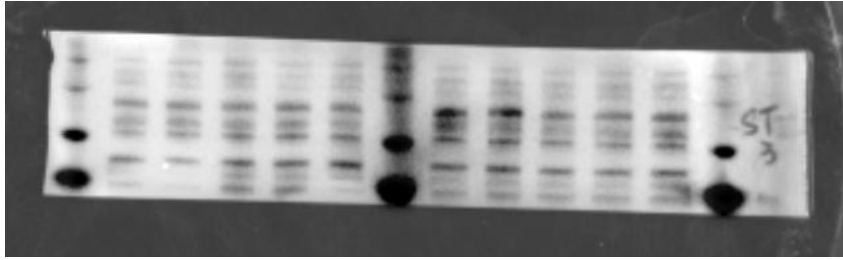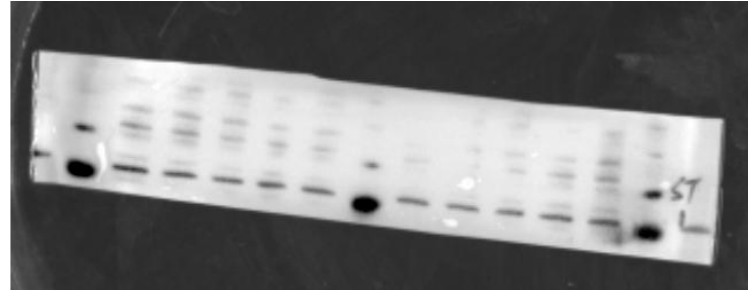

Target protein bands

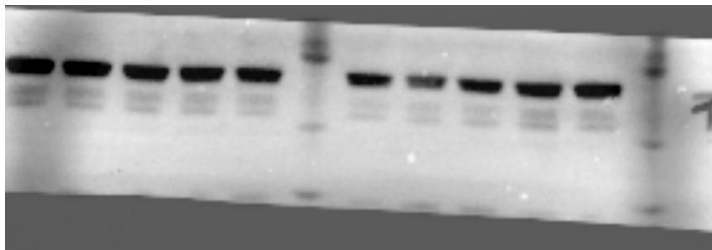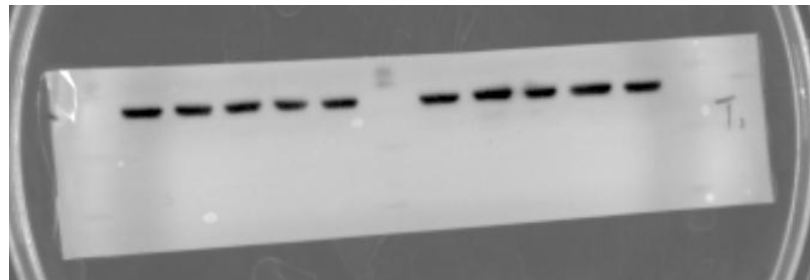

Internal reference protein bands

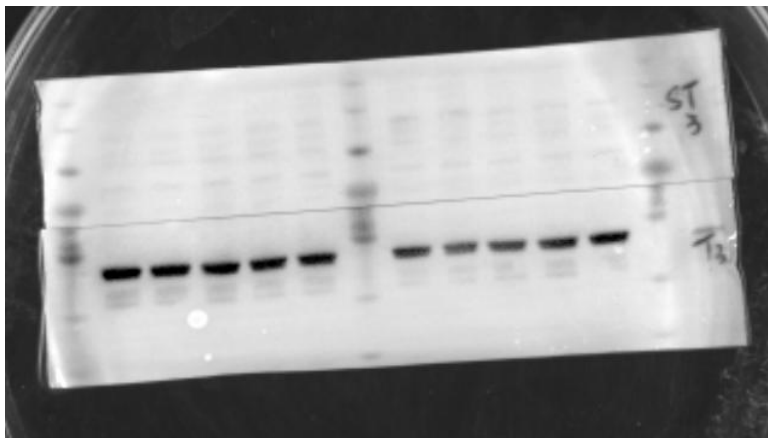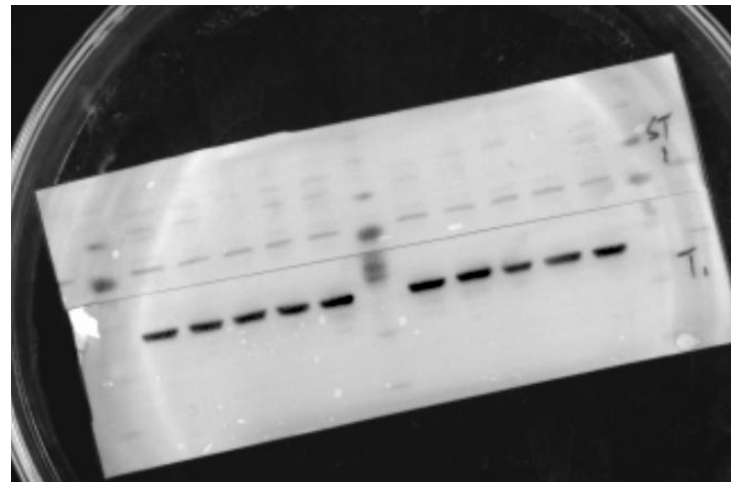

Destination Strip Internal Reference  
Strip Whole Mold Exposure

## HCT116 - stat3 nuclear protein

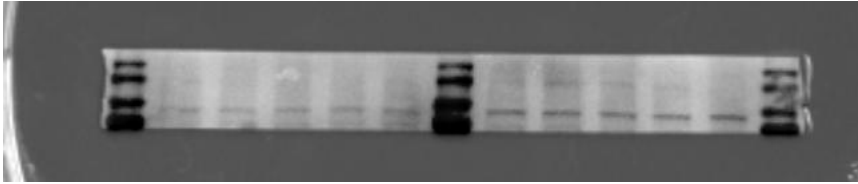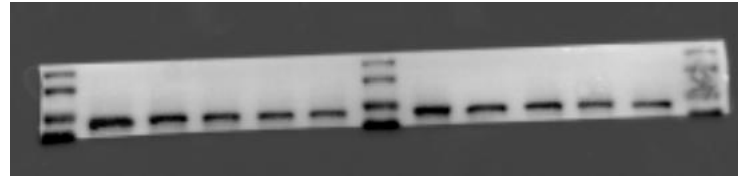

Target protein bands

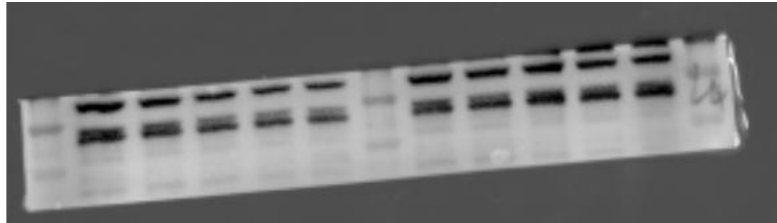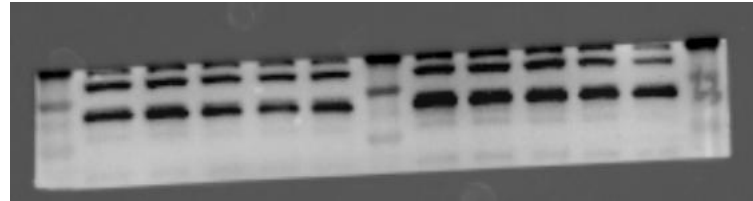

Internal reference protein bands

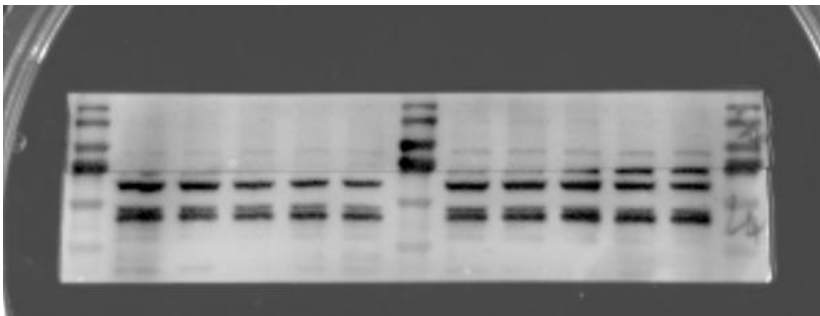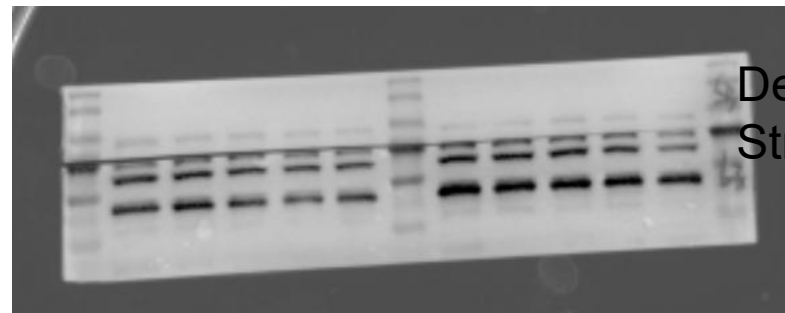

Destination Strip Internal Reference  
Strip Whole Mold Exposure

# HCT116 - VIMENTIN

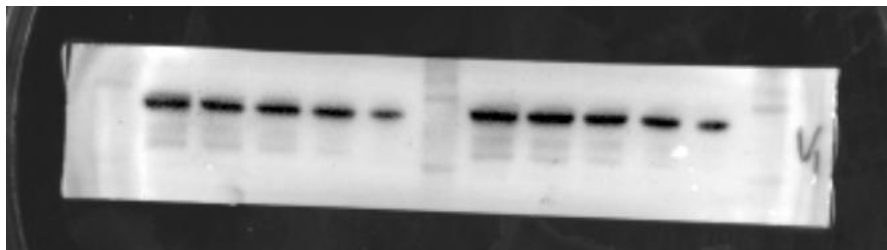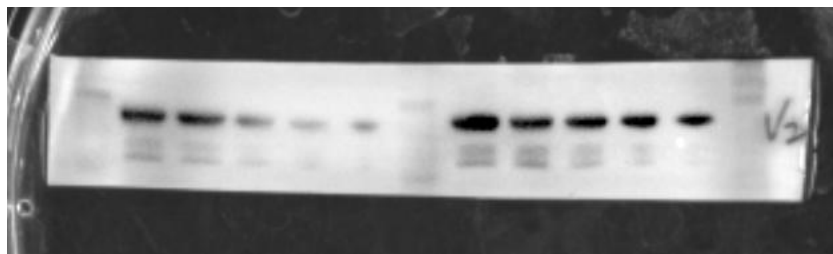

Target protein bands

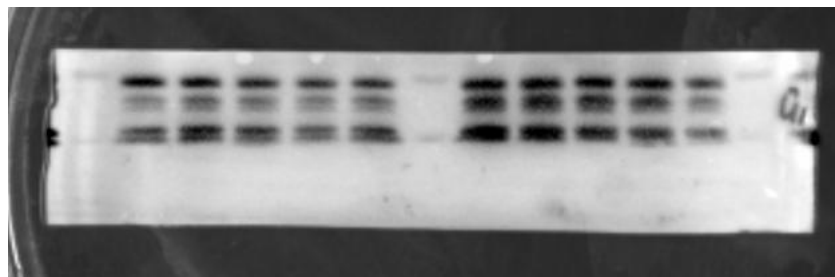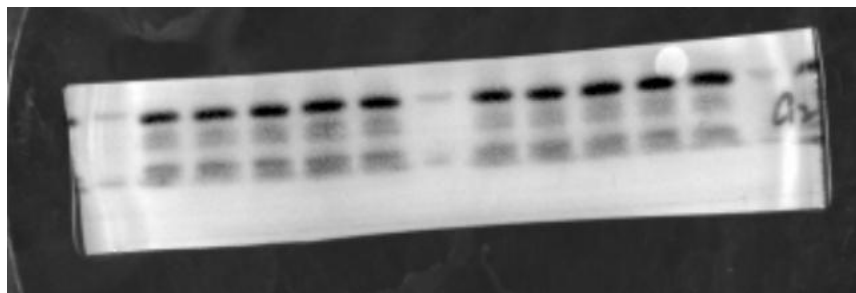

Internal reference protein bands

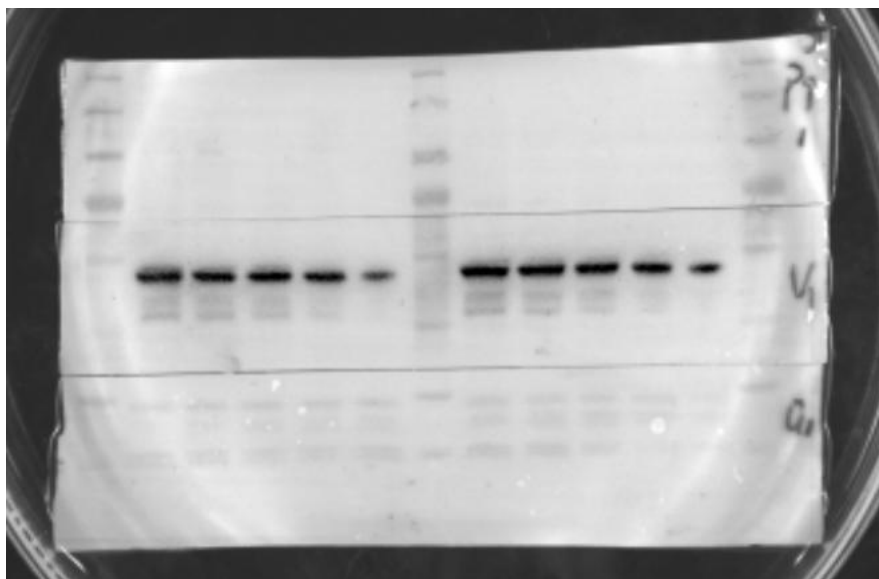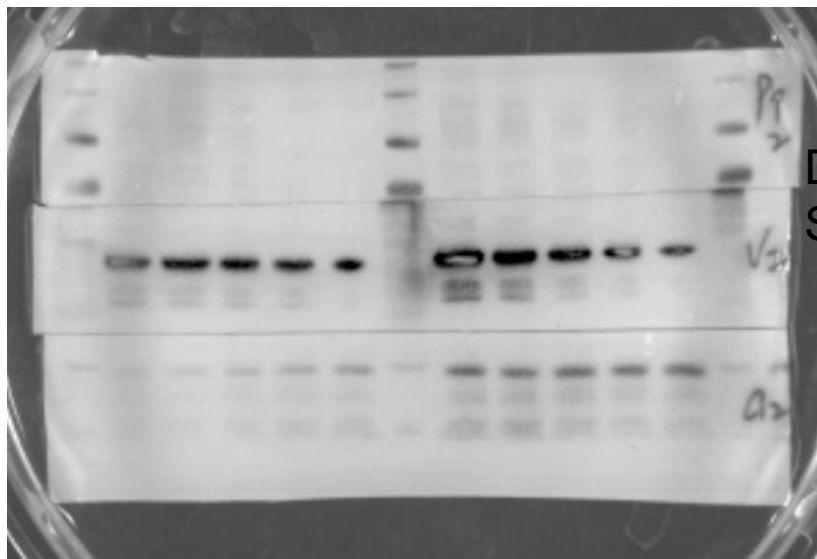

Destination Strip Internal Reference  
Strip Whole Mold Exposure

## HGC-27 - BAX

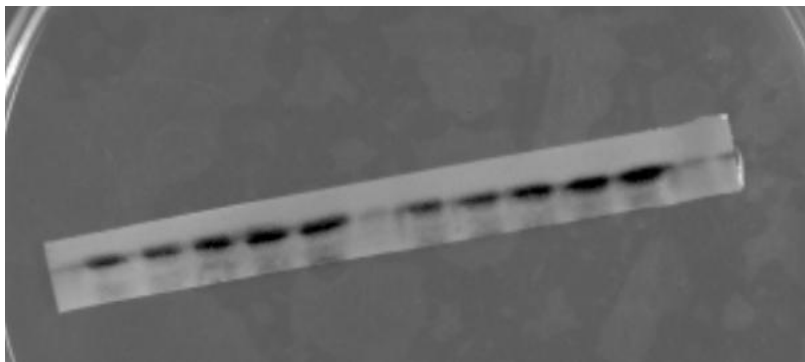

Internal reference protein bands

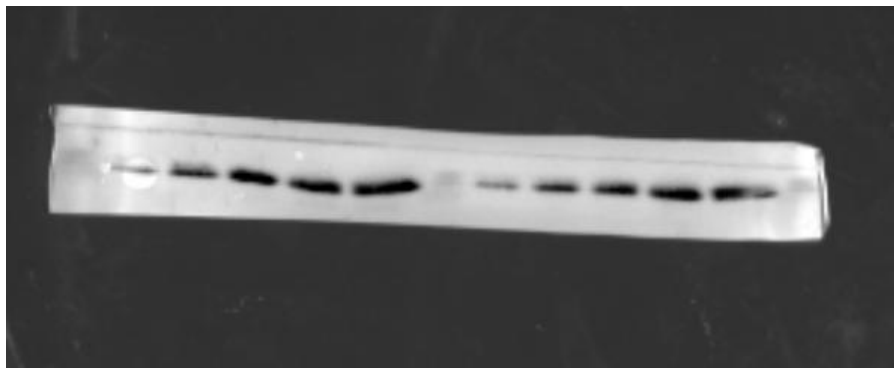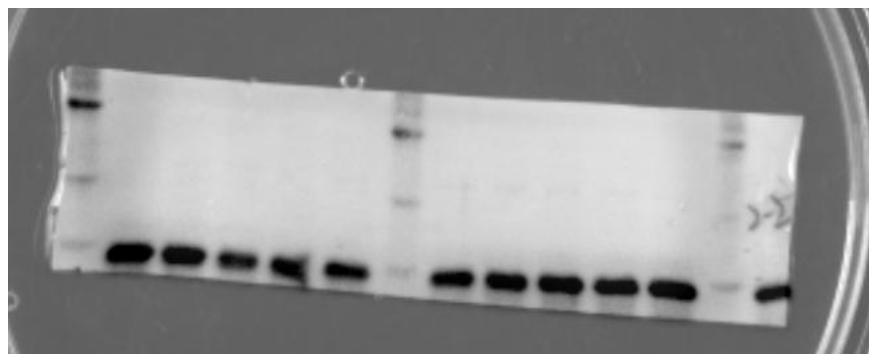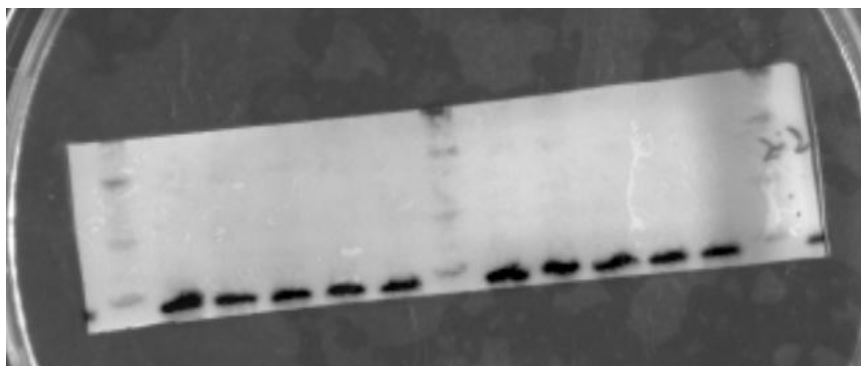

Target protein bands

## HGC-27 - BCL2

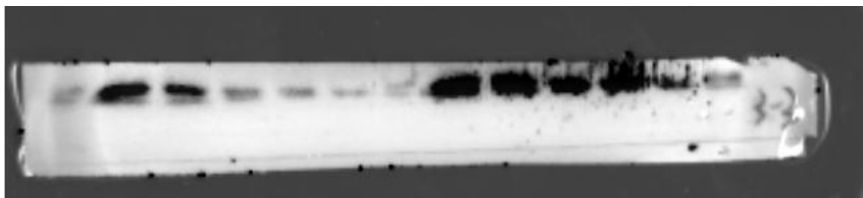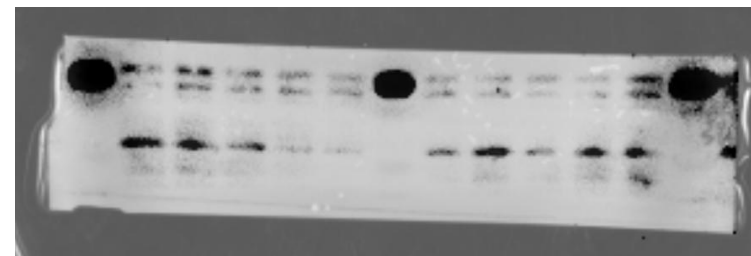

Target protein bands

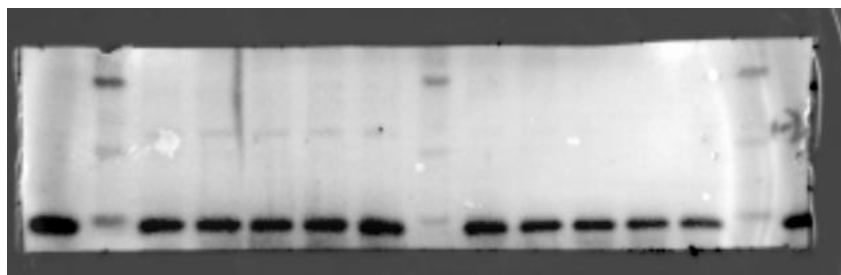

Internal reference protein bands

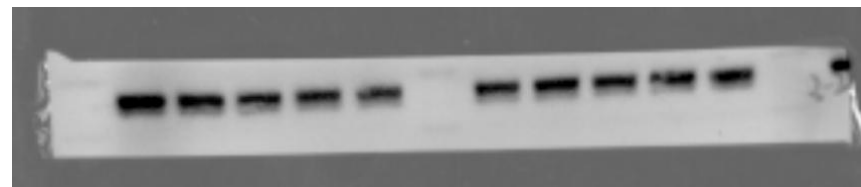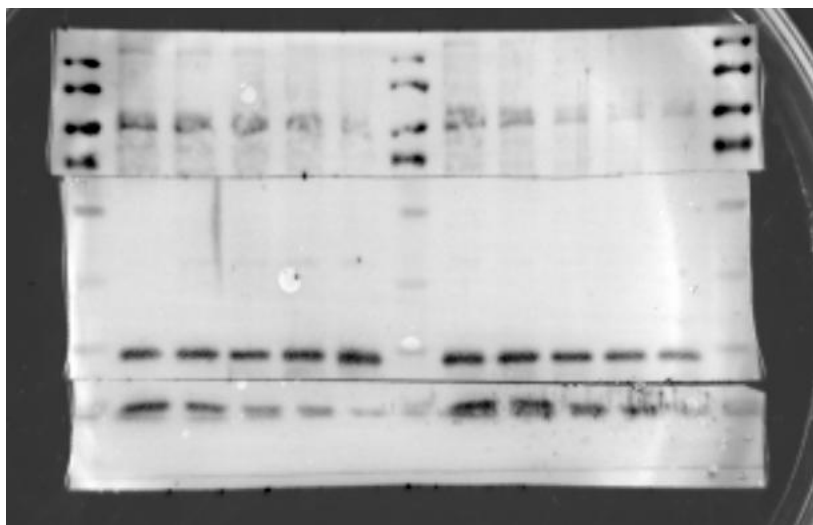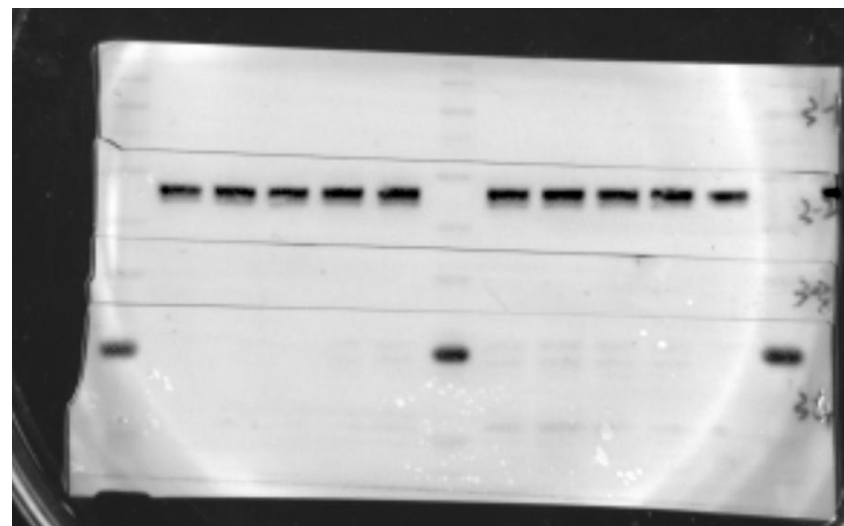

## HGC-27 - CyclinD1

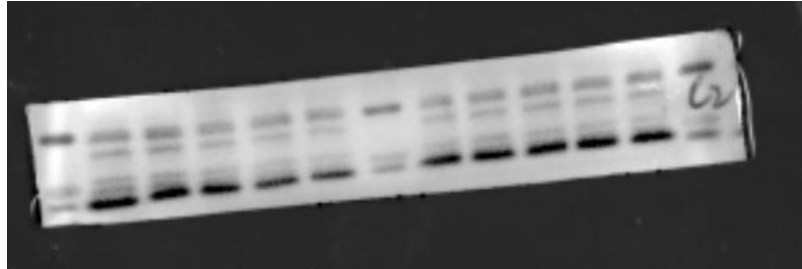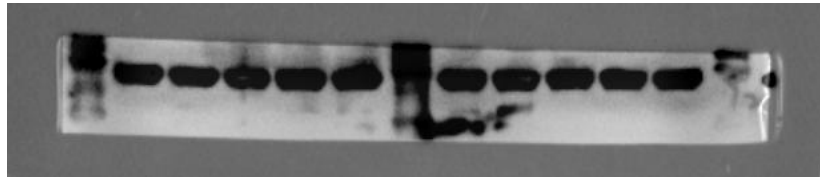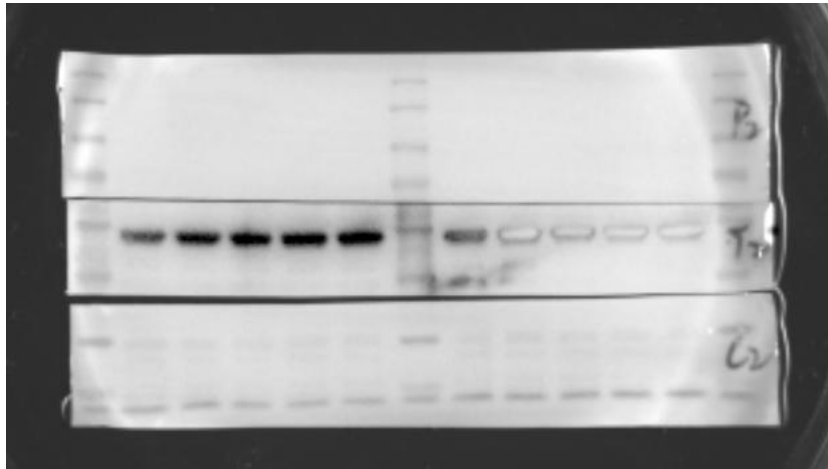

Target protein bands

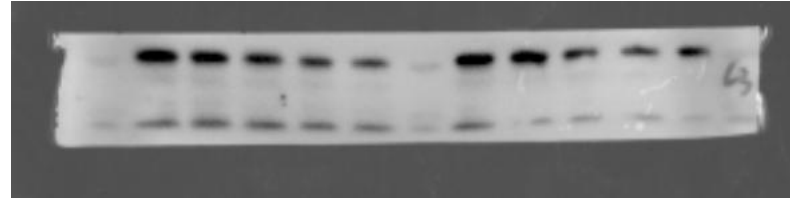

Internal reference protein bands

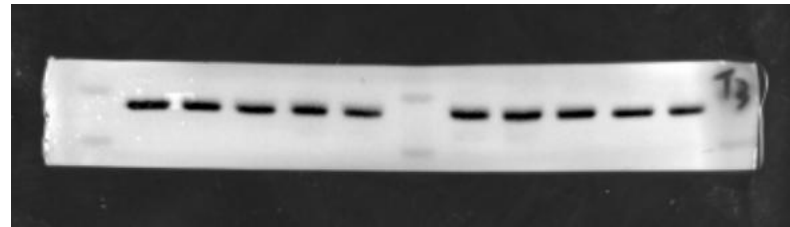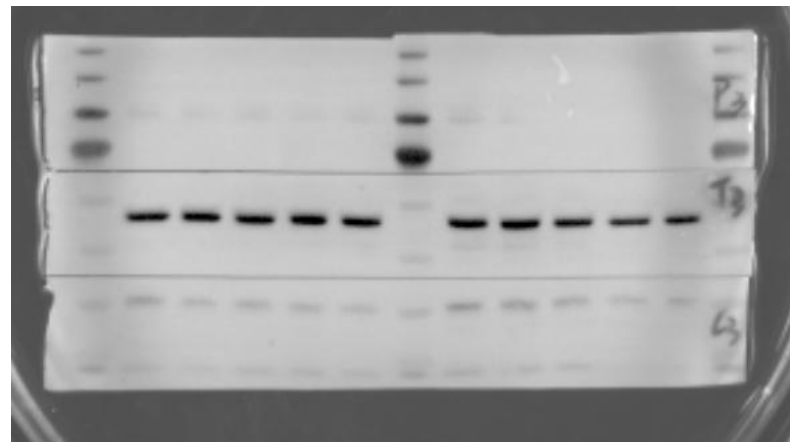

## HGC-27 - E-Cadherin

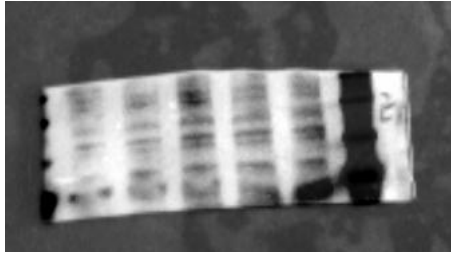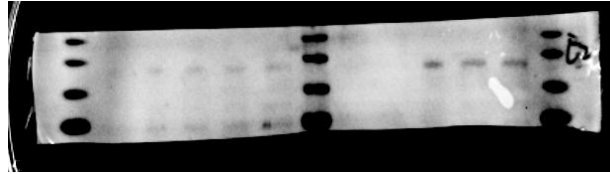

Target protein bands

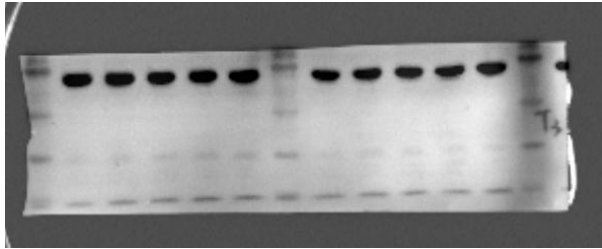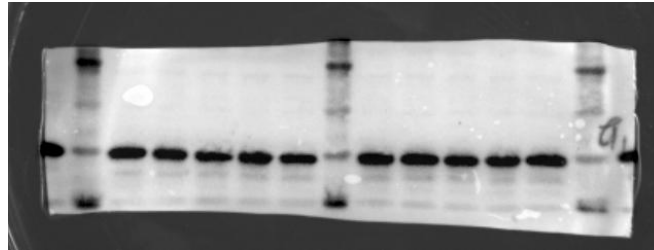

Internal reference protein bands

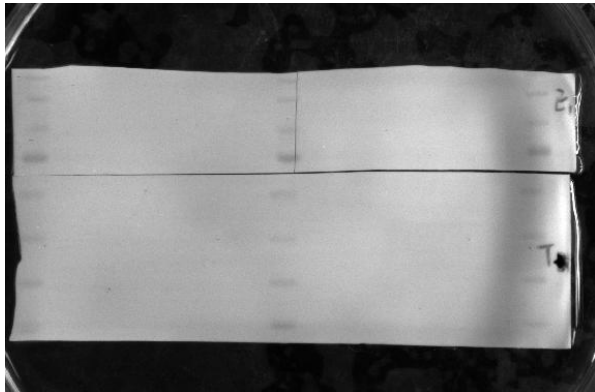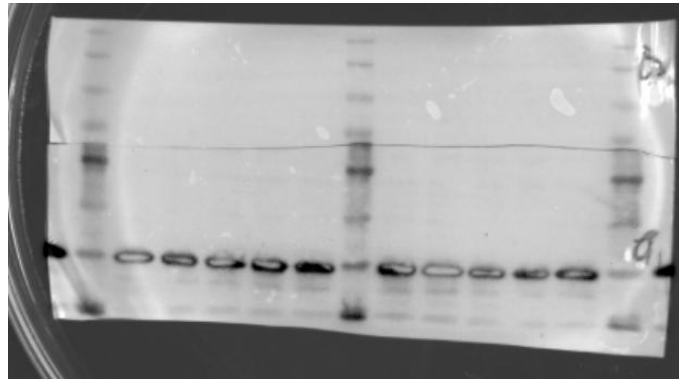

Destination Strip Internal Reference  
Strip Whole Mold Exposure

## HGC-27 - JAK2

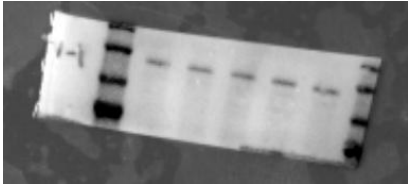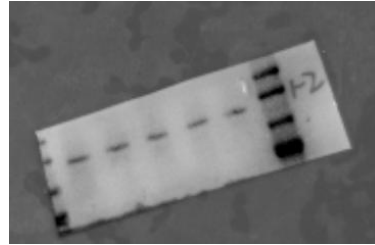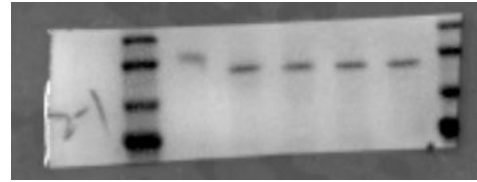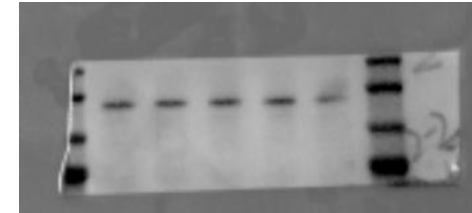

Target protein bands

Internal reference protein bands

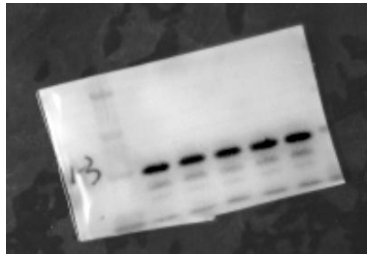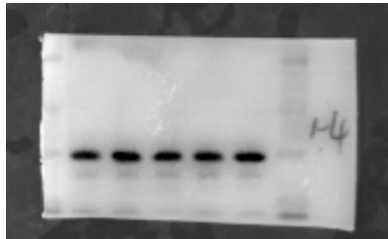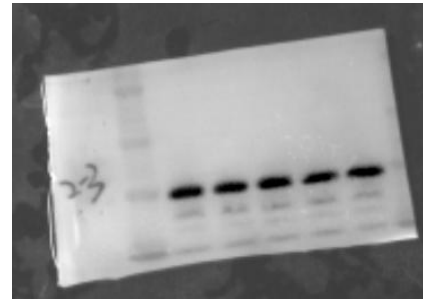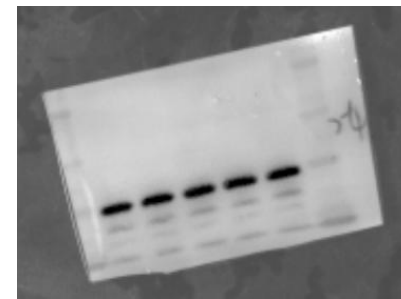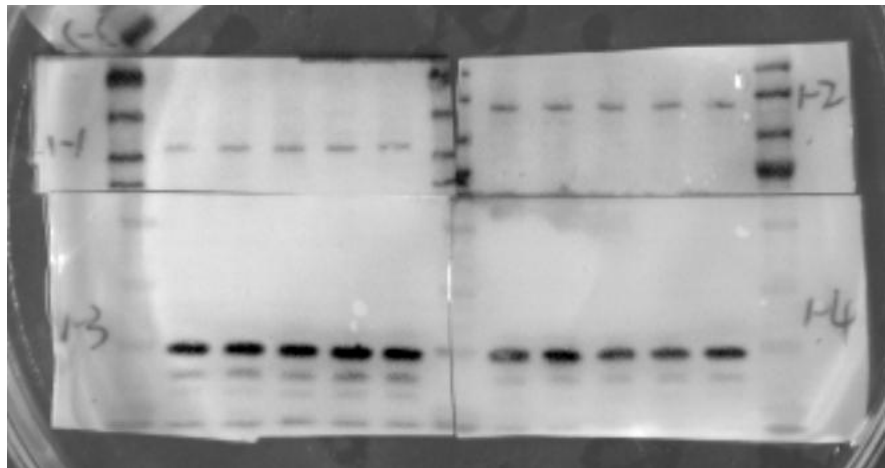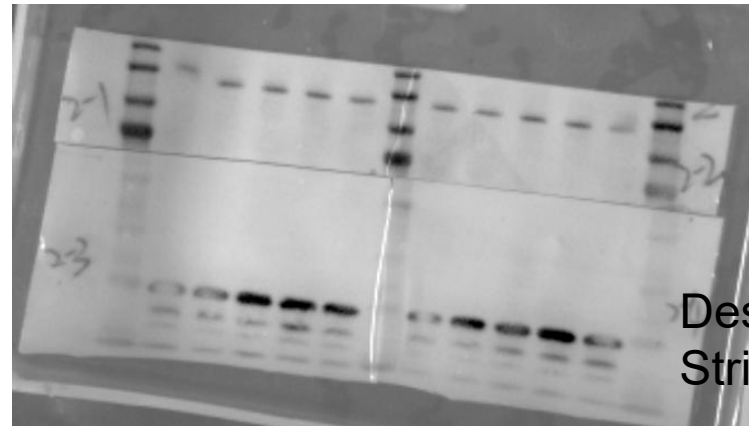

Destination Strip Internal Reference  
Strip Whole Mold Exposure

## HGC-27 - MMP2

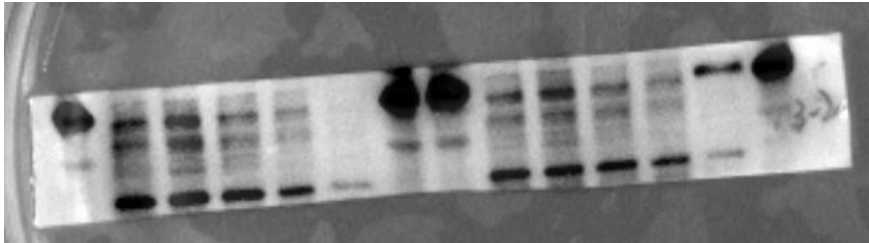

Target protein bands

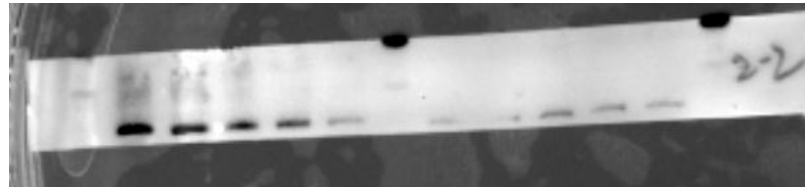

Internal reference protein bands

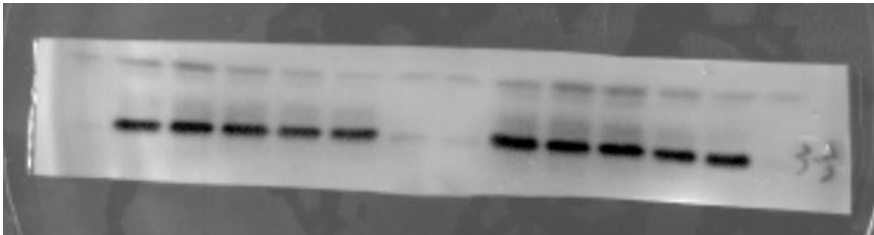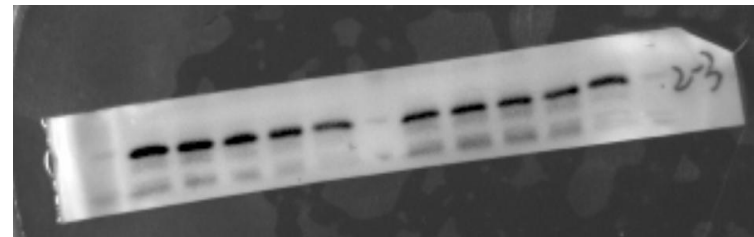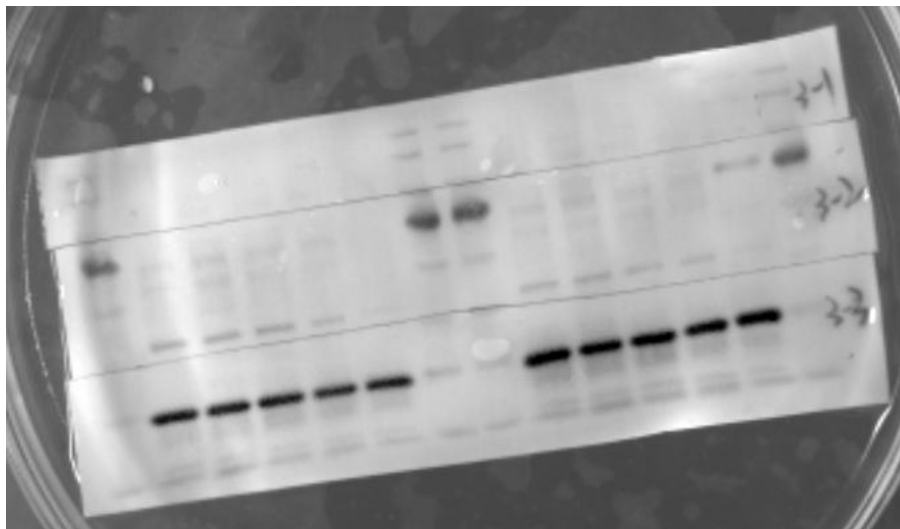

Destination Strip Internal Reference  
Strip Whole Mold Exposure

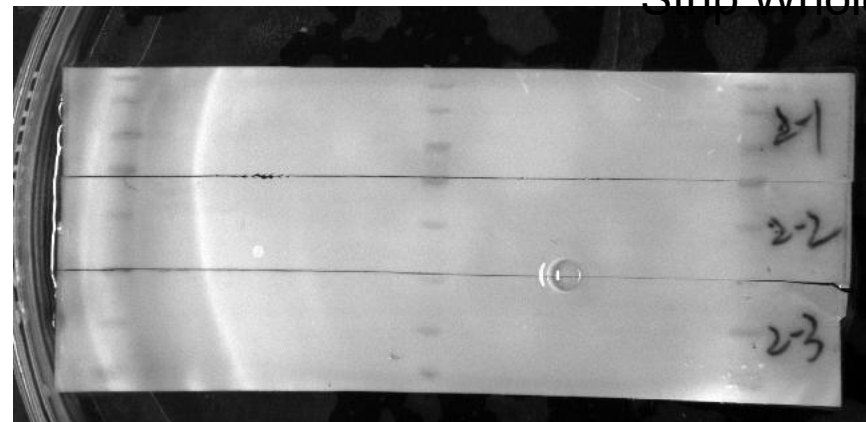

## HGC-27 - MMP9

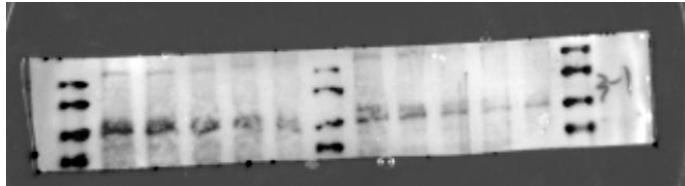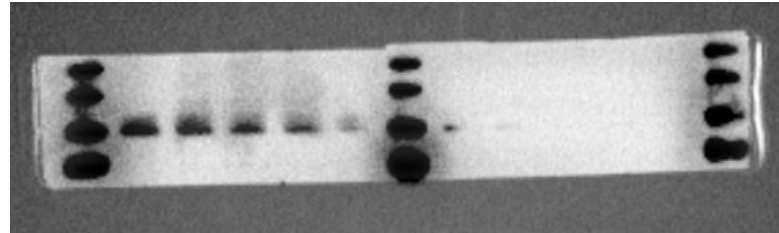

Target protein bands

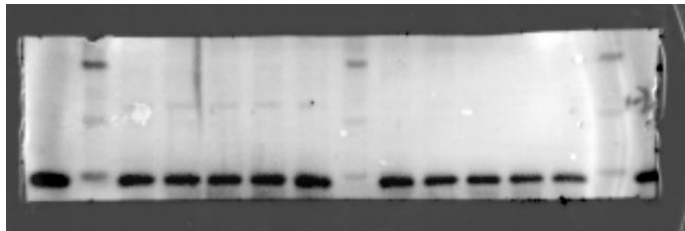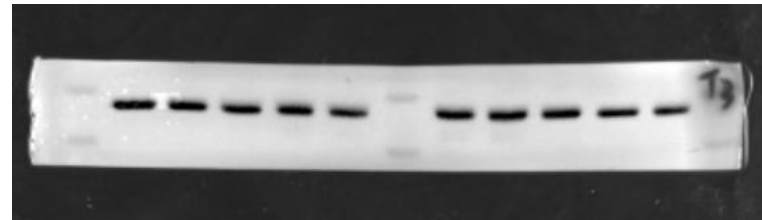

Internal reference protein bands

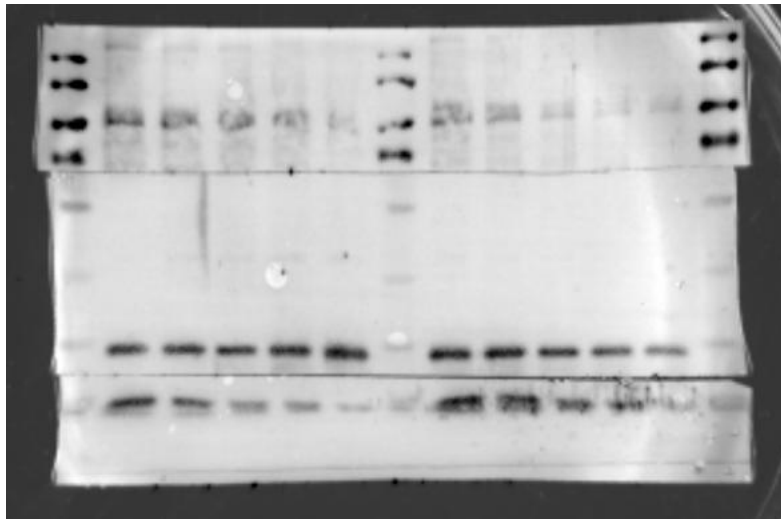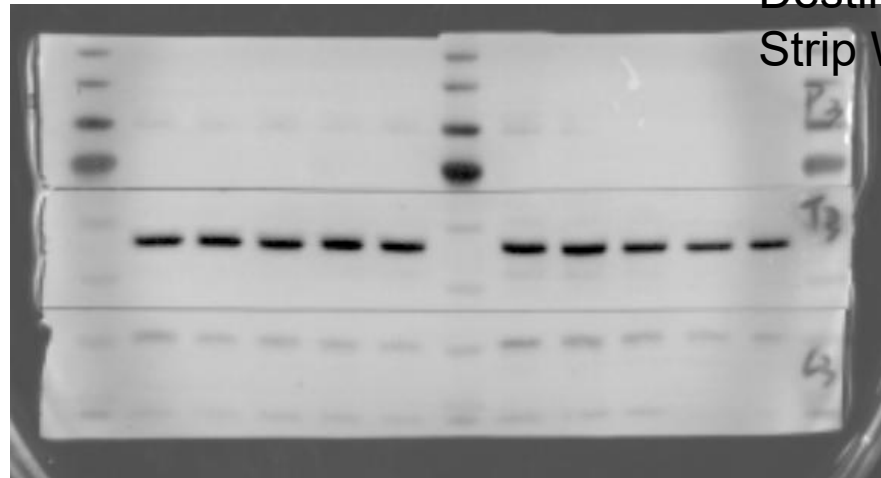

Destination Strip Internal Reference  
Strip Whole Mold Exposure

## HGC-27 - N-Cadherin

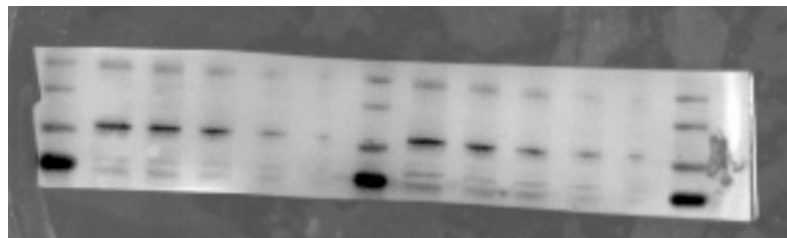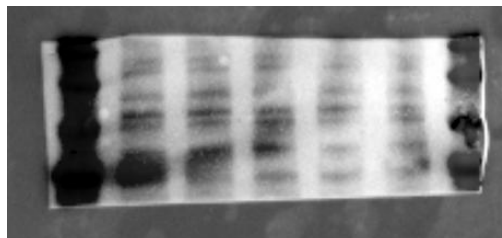

Target protein bands

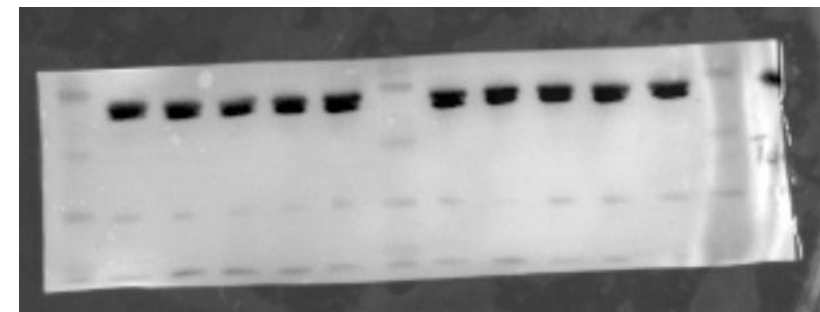

Internal reference protein bands

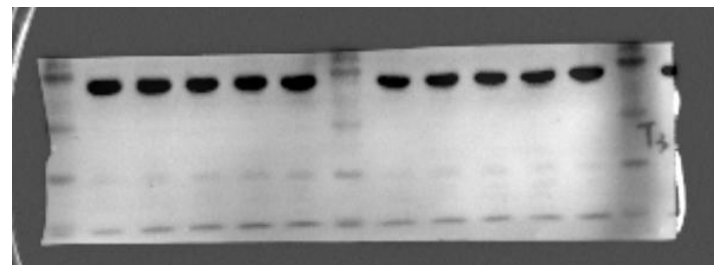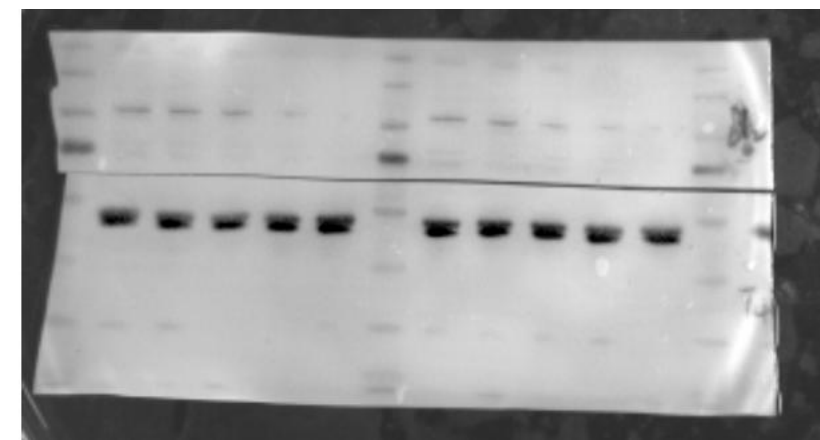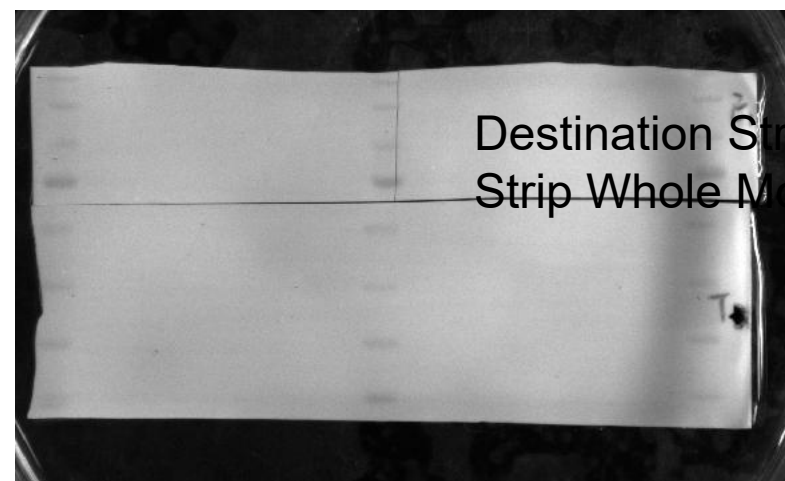

Destination Strip Internal Reference  
Strip Whole Mold Exposure

## HGC-27 - P-JAK2

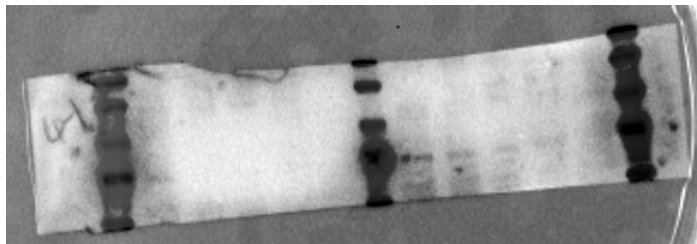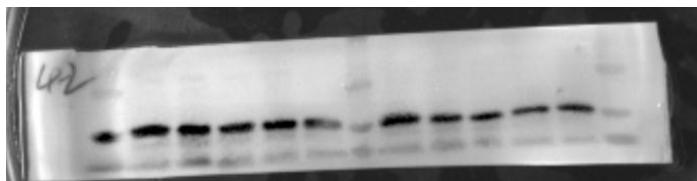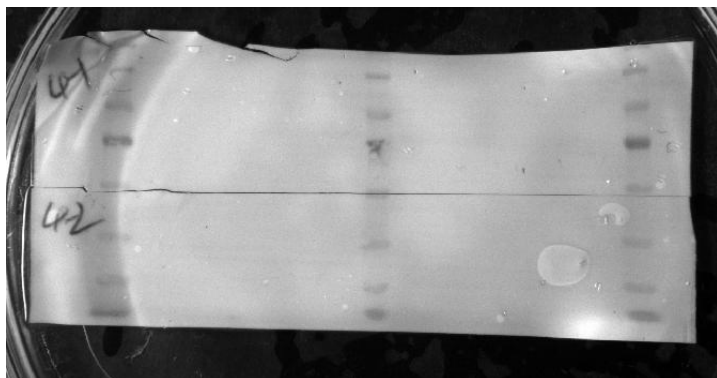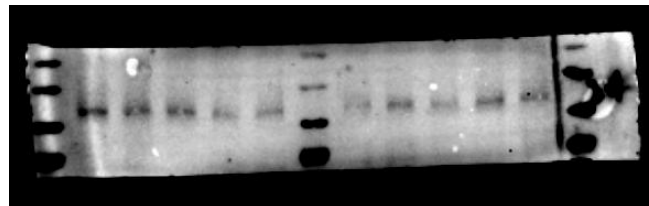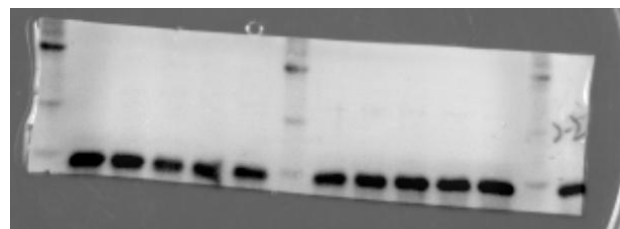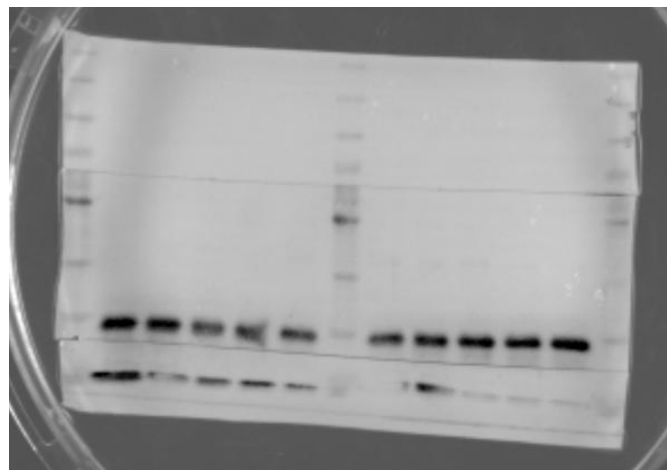

Target protein bands

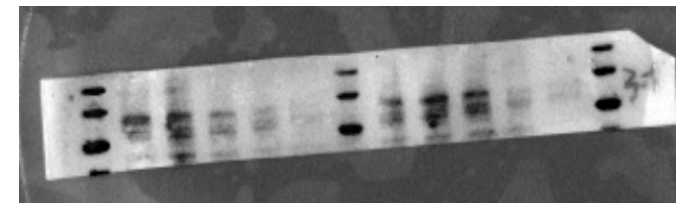

Internal reference protein bands

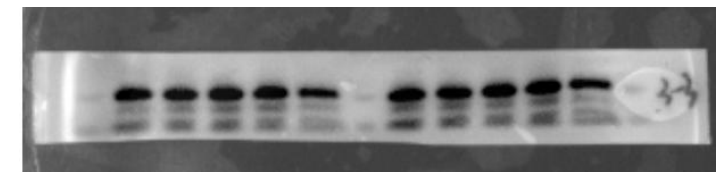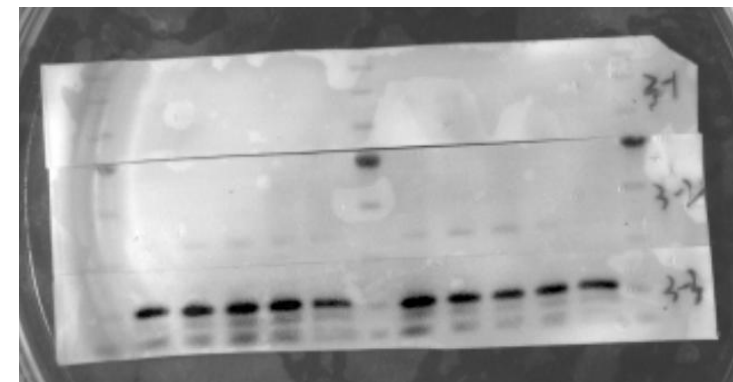

Destination Strip Internal Reference  
Strip Whole Mold Exposure

## HGC-27 - P-STAT3

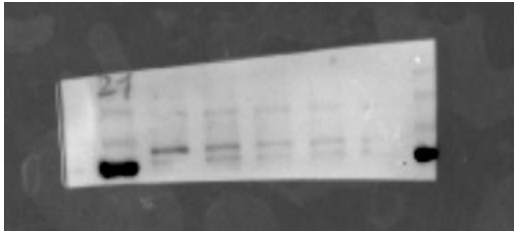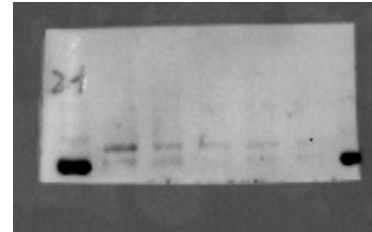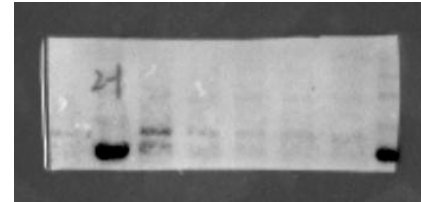

Target protein bands

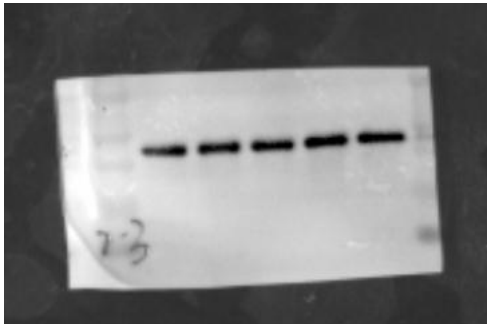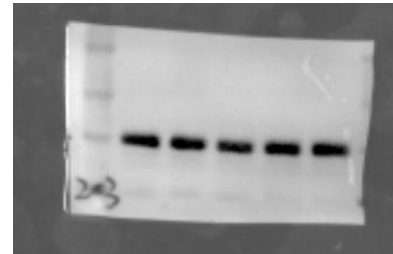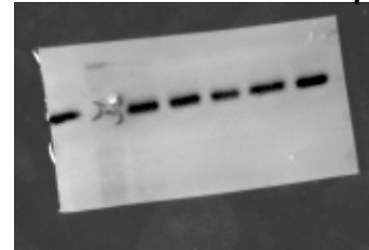

Internal reference protein bands

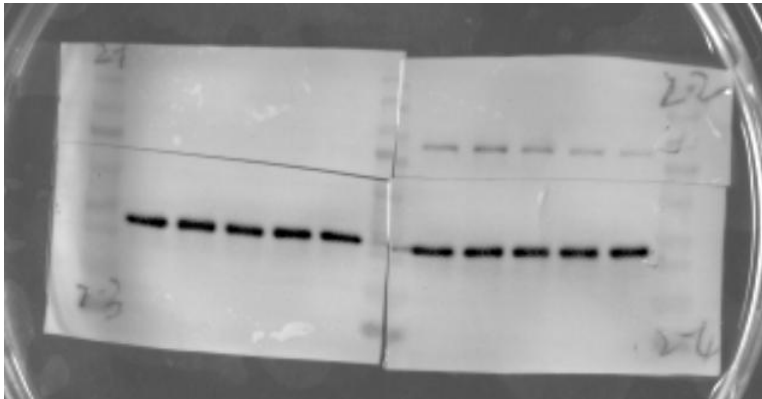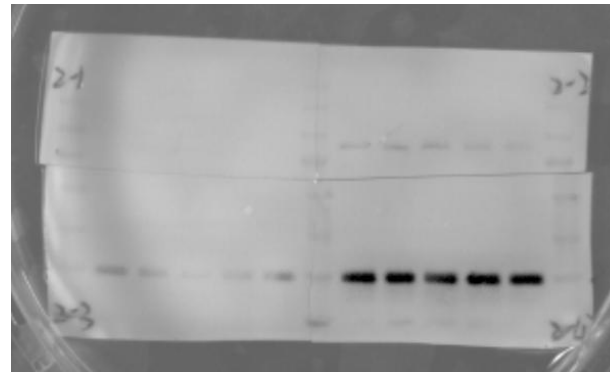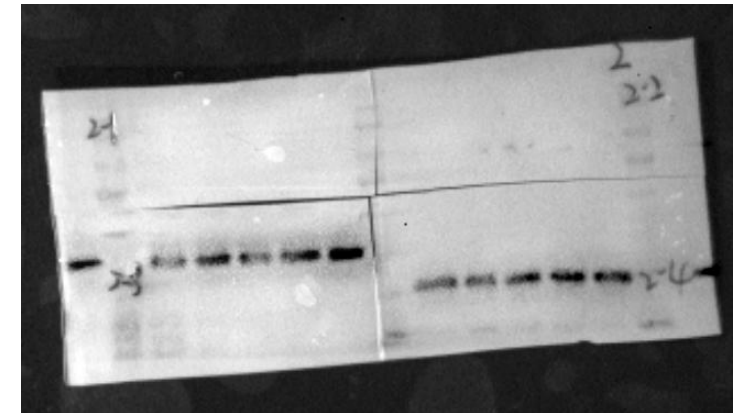

Destination Strip Internal Reference  
Strip Whole Mold Exposure

## HGC-27 - STAT3

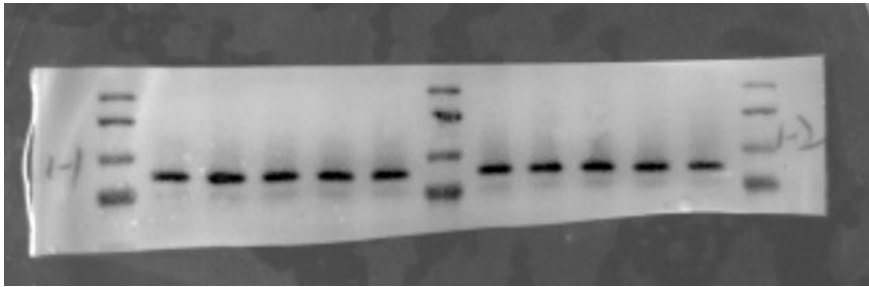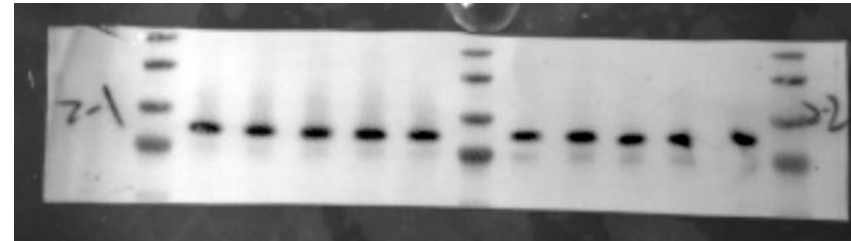

Target protein bands

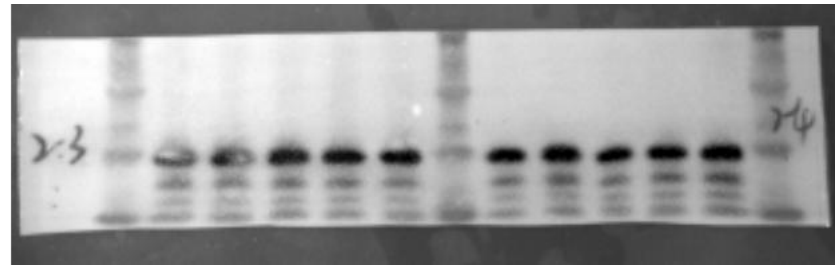

Internal reference protein bands

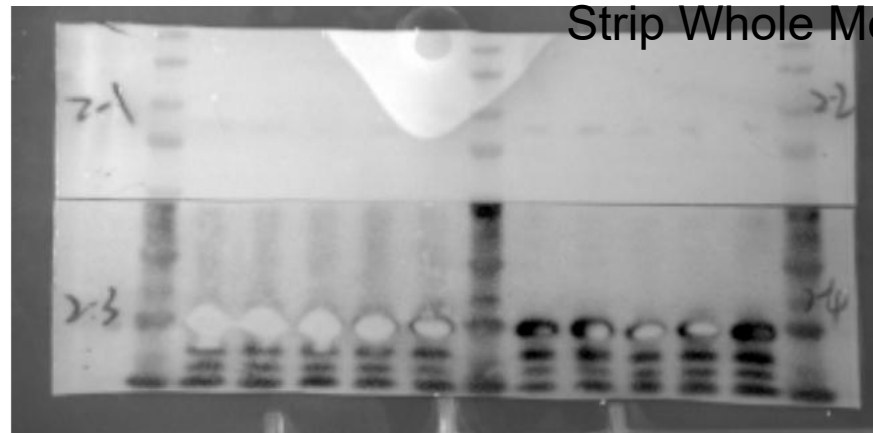

Destination Strip Internal Reference  
Strip Whole Mold Exposure

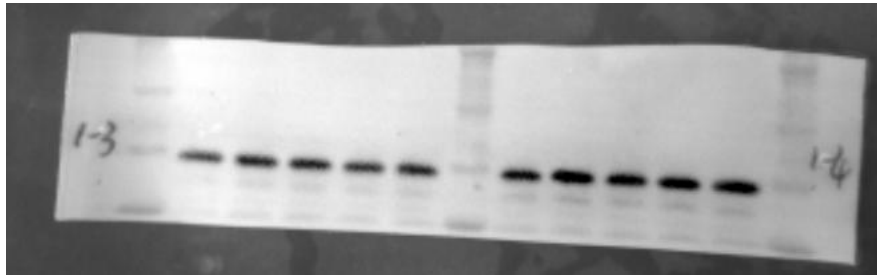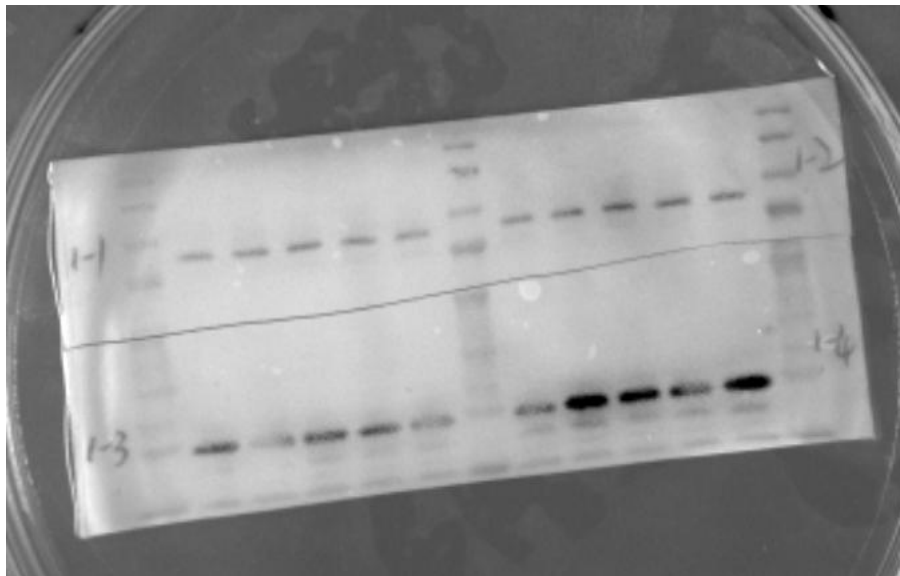

## HGC-27 - stat3 nuclear protein

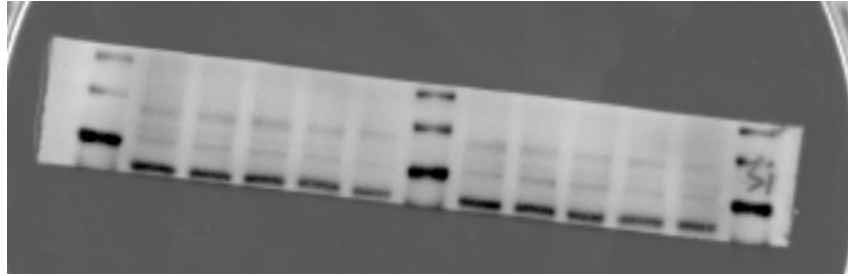

Target protein bands

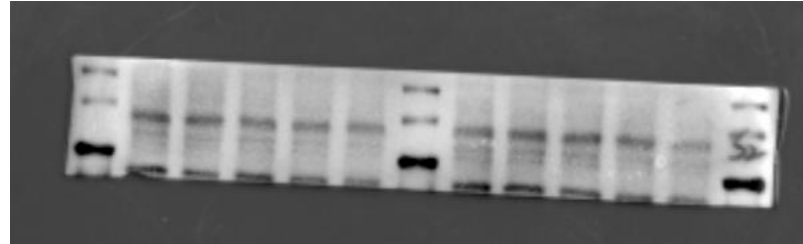

Internal reference protein bands

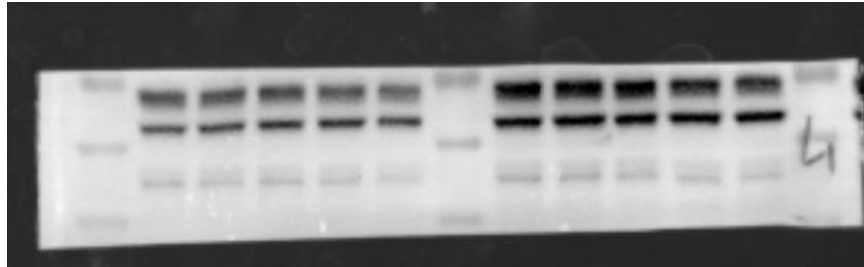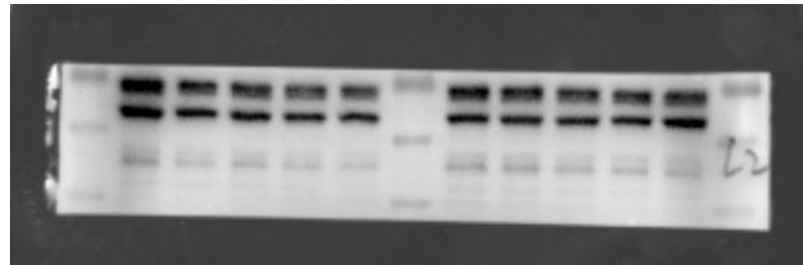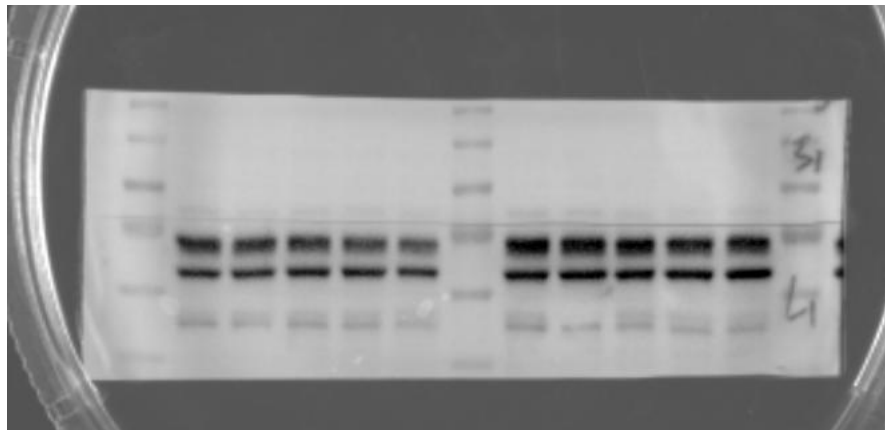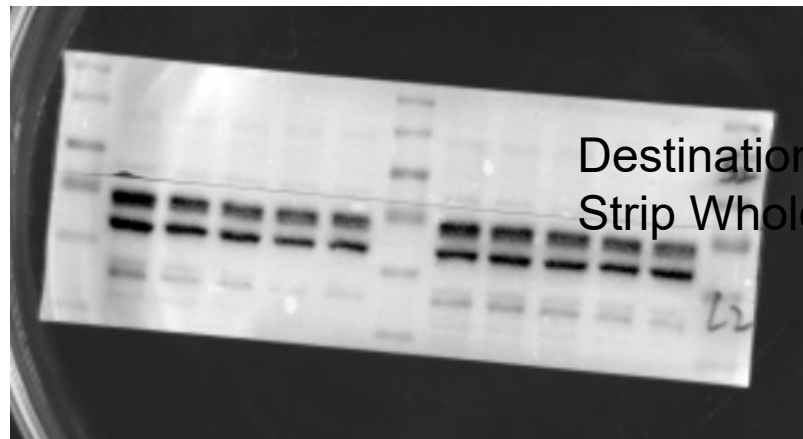

Destination Strip Internal Reference  
Strip Whole Mold Exposure

## HGC-27 - VIMENTIN

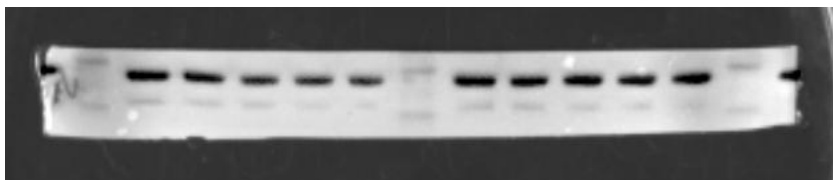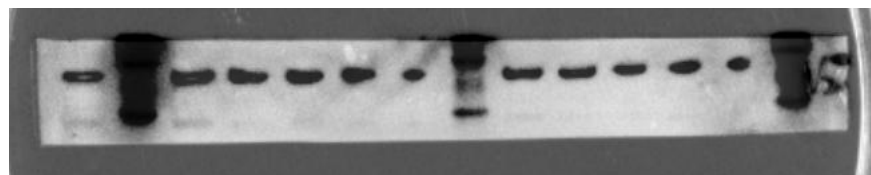

Target protein bands

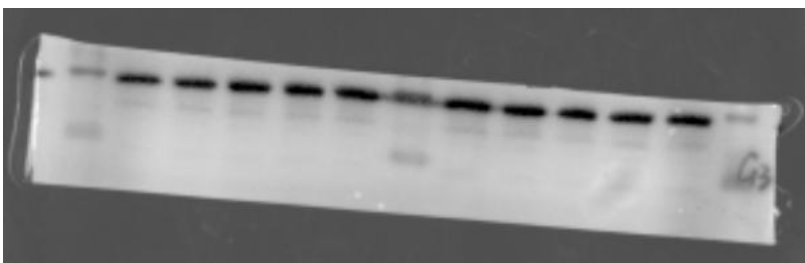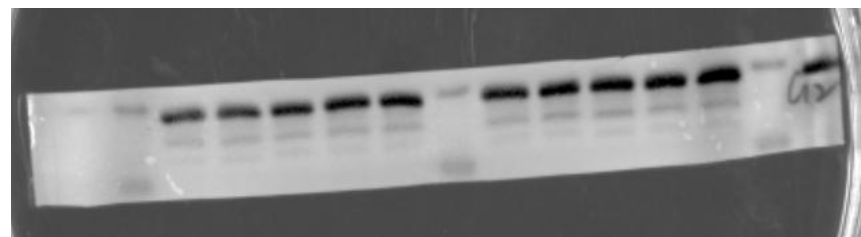

Internal reference protein bands

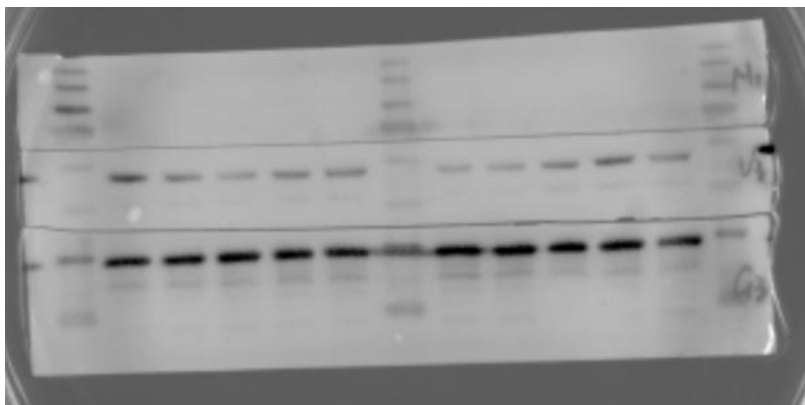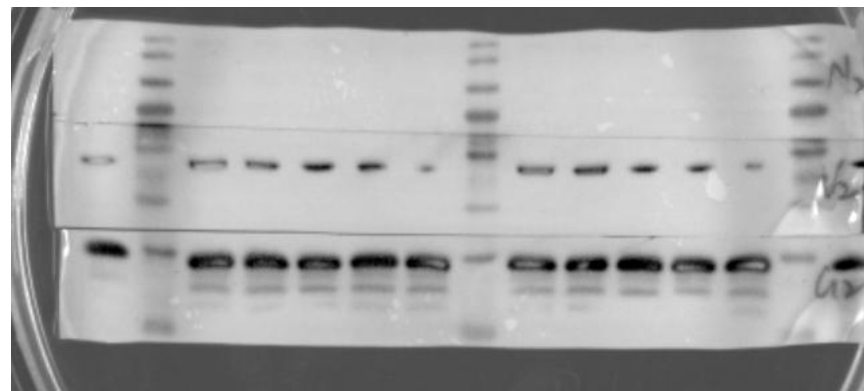

Destination Strip Internal Reference  
Strip Whole Mold Exposure
